# Supplementary material for: Short Communication: Aging of basalt volcanic systems and decreasing CO 2 consumption by weathering
Source: Copernicus journal article supplement (doi:10.5194/esurf-2018-10), 2018-03-22
Supplement: Supplementary file 1 [file esurf-2018-10-supplement.pdf]

1  
2  
3  
4  
5  
6  
7  
8  
9

**Supplementary Materials for**

**Short Communication: Aging of basalt volcanic systems and decreasing CO<sub>2</sub> consumption by weathering**

This supplementary material describes available information on volcanic basalt areas and calculation procedures. For the active volcanic fields (AVF) a detailed description of the calculation for the Holocene area fraction is given. Additionally, a description of the new alkalinity flux equation for young active basaltic areas and an explanation for the calculation of the global fluxes is provided.

8 **Part One: Summary of data compilation**

*Table S1: Summary of the data of IVFs and AVFs used for this study.*

| No. | Name             | Volcanic activity | T (°C) | Runoff (mm/a) | HCO <sub>3</sub> <sup>-</sup> (μmol/L) | Latitude | Longitude | Holocene fraction (%) | Reactivity |
|-----|------------------|-------------------|--------|---------------|----------------------------------------|----------|-----------|-----------------------|------------|
| 1   | Massif Central   | Inactive          | 8.7    | 406           | 916                                    | 45.77    | 2.96      | 0.00                  | 1.02       |
| 2   | South Africa     | Inactive          | 12.7   | 244           | 1728                                   | -25.28   | 29.63     | 0.00                  | 0.87       |
| 3   | Karelia          | Inactive          | -2.0   | 285           | 460                                    | 65.00    | 31.00     | 0.00                  | 0.75       |
| 4   | Coastal Deccan   | Inactive          | 25.1   | 1690          | 657                                    | 16.93    | 73.51     | 0.00                  | 0.98       |
| 5   | Interior Deccan  | Inactive          | 25.4   | 401           | 2839                                   | 21.00    | 74.00     | 0.00                  | 0.98       |
| 6   | Siberia Traps    | Inactive          | -8.5   | 254           | 501                                    | 65.00    | 100.00    | 0.00                  | 1.14       |
| 7   | E'Mei            | Inactive          | 6.2    | 1350          | 238                                    | 27.45    | 103.33    | 0.00                  | 1.04       |
| 8   | Lei-Qiong        | Inactive          | 24.0   | 797           | 1923                                   | 20.46    | 110.18    | 0.00                  | 1.46       |
| 9   | Nanjing          | Inactive          | 15.2   | 330           | 1595                                   | 32.74    | 118.39    | 0.00                  | 0.92       |
| 10  | Xiaoxinganling   | Inactive          | -1.0   | 243           | 1065                                   | 49.09    | 128.17    | 0.00                  | 1.39       |
| 11  | Tumen River      | Inactive          | -4.0   | 273           | 763                                    | 42.50    | 128.50    | 0.00                  | 1.37       |
| 12  | Mudan River      | Inactive          | 3.2    | 209           | 977                                    | 43.75    | 128.72    | 0.00                  | 0.82       |
| 13  | SE Australia     | Inactive          | 13.0   | 74            | 5956                                   | -38.19   | 142.86    | 0.00                  | 0.90       |
| 14  | Tasmania         | Inactive          | 10.1   | 221           | 1704                                   | -42.19   | 146.76    | 0.00                  | 0.94       |
| 15  | North Island, NZ | Inactive          | 13.0   | 920           | 478                                    | -38.00   | 176.00    | 0.00                  | 0.89       |
| 16  | Kauai, Hawaii    | Inactive          | 21.6   | 1747          | 588                                    | 22.00    | -159.50   | 0.00                  | 1.15       |
| 17  | Columbia Plateau | Inactive          | 7.4    | 204           | 927                                    | 44.00    | -118.50   | 0.00                  | 0.57       |
| 18  | NE America       | Inactive          | 0.7    | 507           | 465                                    | 47.05    | -75.32    | 0.00                  | 1.12       |
| 19  | Madeira Island   | Inactive          | 13.5   | 1065          | 580                                    | 32.80    | -17.00    | 0.00                  | 1.21       |
| 20  | Easter Island    | Active            | 20.6   | 580           | 1306                                   | -27.12   | -109.37   | 3.36                  | 0.91       |
| 21  | Mt. Cameroon     | Active            | 14.0   | 2120          | 2368                                   | 4.00     | 9.00      | 96.57                 | 9.53       |
| 22  | Mt. Etna         | Active            | 14.9   | 640           | 9286                                   | 37.75    | 15.00     | 79.56                 | 10.60      |
| 23  | Virunga          | Active            | 20.8   | 1709          | 2646                                   | -1.50    | 29.50     | 48.02                 | 5.36       |
| 24  | La Réunion       | Active            | 17.0   | 1712          | 1243                                   | -21.12   | 55.54     | 28.13                 | 3.28       |

|    |                    |        |      |      |      |        |         |       |      |
|----|--------------------|--------|------|------|------|--------|---------|-------|------|
| 25 | Wudalianchi Lake   | Active | -1.0 | 243  | 1919 | 48.70  | 126.14  | 14.82 | 2.50 |
| 26 | Japan              | Active | 11.0 | 1236 | 584  | 35.92  | 135.36  | 8.70  | 1.69 |
| 27 | Kamchatka          | Active | -3.5 | 520  | 854  | 55.00  | 159.00  | 2.28  | 2.83 |
| 28 | Taranaki           | Active | 10.0 | 1296 | 667  | -39.30 | 174.00  | 8.00  | 2.16 |
| 29 | Big Island, Hawaii | Active | 15.4 | 935  | 951  | 19.50  | -155.50 | 13.73 | 1.53 |
| 30 | High Cascades      | Active | 6.8  | 382  | 776  | 45.19  | -121.68 | 0.20  | 0.92 |
| 31 | São Miguel         | Active | 16.0 | 879  | 2331 | 37.77  | -25.50  | 9.35  | 3.38 |
| 32 | Iceland            | Active | 0.7  | 1734 | 498  | 65.00  | -18.00  | 13.19 | 4.11 |
| 33 | Tianchi Lake       | Active | -7.3 | 291  | 2445 | 42.00  | 128.05  | 65.34 | 5.90 |

8

9 In the following, all active volcanic provinces used for this study are described. Note,  
10 that for all inactive fields a detailed description of the input data can be found in Li et al.  
11 (2016), as well as the origin of the temperature, runoff and alkalinity concentration data  
12 for active volcanic fields. If watersheds are considered for the calculations of the  
13 Holocene area, they are based on the locations of the sampling points (see Li et al.  
14 (2016)).

15

16 **In the following, the new data for active volcanic fields are described (Table S1)**

17 **Easter Island (No.20)**

18 Easter Island is a volcanic island in the eastern pacific. Its volcanic nature is related to  
 19 the Easter Island Hotspot. The geologic map used for this study was digitized after a  
 20 map of Gioncada et al. (2010) and references therein. The island is composed mostly of  
 21 hawaiites, mugearites and olivine basalts and it comprises volcanic ages from 3 Ma to  
 22 recent. The different age classifications and lithologies are listed in the table below. Due  
 23 to the precise age information the rocks could be directly classified into Holocene rocks  
 24 and non-Holocene rocks. The total basaltic area of the island is 162.28 km<sup>2</sup>, the  
 25 Holocene area 5.45 km<sup>2</sup> and the non-Holocene area 156.82 km<sup>2</sup>, resulting in a  
 26 Holocene area fraction of 3.36%.

27

*Table S2: Classification of the map data of Easter Island. The first three columns provide the original map data, whereas the column "System/Series" shows our interpretation of the map data.*

| <b>Name</b> | <b>Description</b>                                   | <b>Age</b>  | <b>System/Series</b> |
|-------------|------------------------------------------------------|-------------|----------------------|
| TE1         | Terevaka, hawaiites and olivine basalts              | 1.9-0.3 Ma  | non-Holocene         |
| TE2         | Terevaka, hawaiites and olivine basalts              | 1.9-0.3 Ma  | non-Holocene         |
| TE3         | Terevaka, hawaiites and olivine basalts              | 1.9-0.3 Ma  | non-Holocene         |
| HH2         | Anakena, Hiva-Hiva, hawaiites and olivine basalts    | 0-2000a ago | Holocene             |
| RA1         | Rano Aroi, hawaiites, olivine basalts and mugearites | 0.2 Ma      | non-Holocene         |
| RA5         | Rano Aroi, hawaiites, olivine basalts and mugearites | 0.2 Ma      | non-Holocene         |
| RA4         | Rano Aroi, hawaiites, olivine basalts and mugearites | 0.2 Ma      | non-Holocene         |
| RA2         | Rano Aroi, hawaiites, olivine basalts and mugearites | 0.2 Ma      | non-Holocene         |
| RA8         | Rano Aroi, hawaiites, olivine basalts and mugearites | 0.2 Ma      | non-Holocene         |
| RA7         | Rano Aroi, hawaiites, olivine basalts and mugearites | 0.2 Ma      | non-Holocene         |
| RA6         | Rano Aroi, hawaiites, olivine basalts and mugearites | 0.2 Ma      | non-Holocene         |
| RA3         | Rano Aroi, hawaiites, olivine basalts and mugearites | 0.2 Ma      | non-Holocene         |
| HH1         | Anakena, Hiva-Hiva, hawaiites and olivine basalts    | 0-2000a ago | Holocene             |
| PO2         | Polke, alkali basalts, hawaiites to mugearites       | 3-0.61 Ma   | non-Holocene         |

|     |                                                     |            |                |
|-----|-----------------------------------------------------|------------|----------------|
| PO1 | Polke, alkali basalts, hawaiites to mugearites      | 3-0.61 Ma  | non-Holocene   |
| PO5 | Polke, alkali basalts, hawaiites to mugearites      | 3-0.61 Ma  | non-Holocene   |
| PO4 | Polke, alkali basalts, hawaiites to mugearites      | 3-0.61 Ma  | non-Holocene   |
| TR  | Maunga Orito, rhyolite; Maunga Parehe, trachyte     | not known  | not considered |
| PO3 | Polke, alkali basalts, hawaiites to mugearites      | 3-0.61 Ma  | non-Holocene   |
| RK1 | Rano Kau, alkali basalts, hawaiites to benmoreites  | 2.5-0.2 Ma | non-Holocene   |
| RK2 | Rano Kau, alkali basalts, hawaiites to benmoreites  | 2.5-0.2 Ma | non-Holocene   |
| TA4 | Tangaroa, hawaiites, olivine basalts and mugearites | 0.2 Ma     | non-Holocene   |
| TA1 | Tangaroa, hawaiites, olivine basalts and mugearites | 0.2 Ma     | non-Holocene   |
| TA2 | Tangaroa, hawaiites, olivine basalts and mugearites | 0.2 Ma     | non-Holocene   |
| TA6 | Tangaroa, hawaiites, olivine basalts and mugearites | 0.2 Ma     | non-Holocene   |
| TA3 | Tangaroa, hawaiites, olivine basalts and mugearites | 0.2 Ma     | non-Holocene   |
| TA5 | Tangaroa, hawaiites, olivine basalts and mugearites | 0.2 Ma     | non-Holocene   |
| TA7 | Tangaroa, hawaiites, olivine basalts and mugearites | 0.2 Ma     | non-Holocene   |

28

29

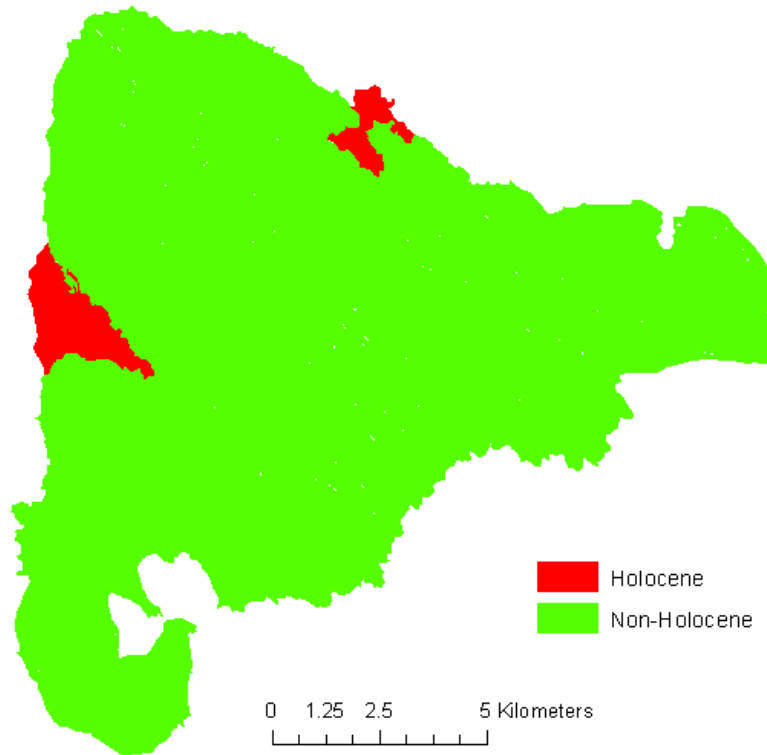

30

*Figure S1: Map of Easter Island showing the Holocene and non-Holocene areas.*

*Table S3: Calculated areas for Easter Island.*

| <b>Area Holocene (km<sup>2</sup>)</b> | <b>Area Non-Holocene (km<sup>2</sup>)</b> | <b>Area Quaternary (km<sup>2</sup>)</b> | <b>Total Area (km<sup>2</sup>)</b> | <b>Holocene (%)</b> |
|---------------------------------------|-------------------------------------------|-----------------------------------------|------------------------------------|---------------------|
| 5.45                                  | 156.83                                    | 0                                       | 162.28                             | 3.36                |

31

32

33 **Mount Cameroon (No.21)**

34 Mount Cameroon is part of a volcanic chain at the coast of West Africa. The geological  
 35 map was digitized from Le Maréchal (1975). The classification of the individual  
 36 lithologies (see table below) results in a Holocene fraction of 96.57%.

*Table S4: Classification of the lithologies of Mt. Cameroon. Note that the first three columns display the original map data, the column "System/Series" provides the authors interpretation.*

| <b>Name</b> | <b>Description</b>                                                                   | <b>Age</b>          | <b>System/Series</b> |
|-------------|--------------------------------------------------------------------------------------|---------------------|----------------------|
| beta1       | Séries inférieures: basaltes parfois andésitiques sous forme de coulées et de dykes  | Oligocene           | non-Holocene         |
| beta3       | Séries supérieures: basaltes parfois andésitiques sous forme de coulées et cinérites | quaternaire récente | Holocene             |

37

*Table S5: Area calculation of Mt. Cameroon.*

| <b>Area Holocene (km<sup>2</sup>)</b> | <b>Area non-Holocene (km<sup>2</sup>)</b> | <b>Area Quaternary (km<sup>2</sup>)</b> | <b>Total Area (km<sup>2</sup>)</b> | <b>Holocene (%)</b> |
|---------------------------------------|-------------------------------------------|-----------------------------------------|------------------------------------|---------------------|
| 1112.63                               | 39.48                                     | 0                                       | 1152.11                            | 96.57               |

38



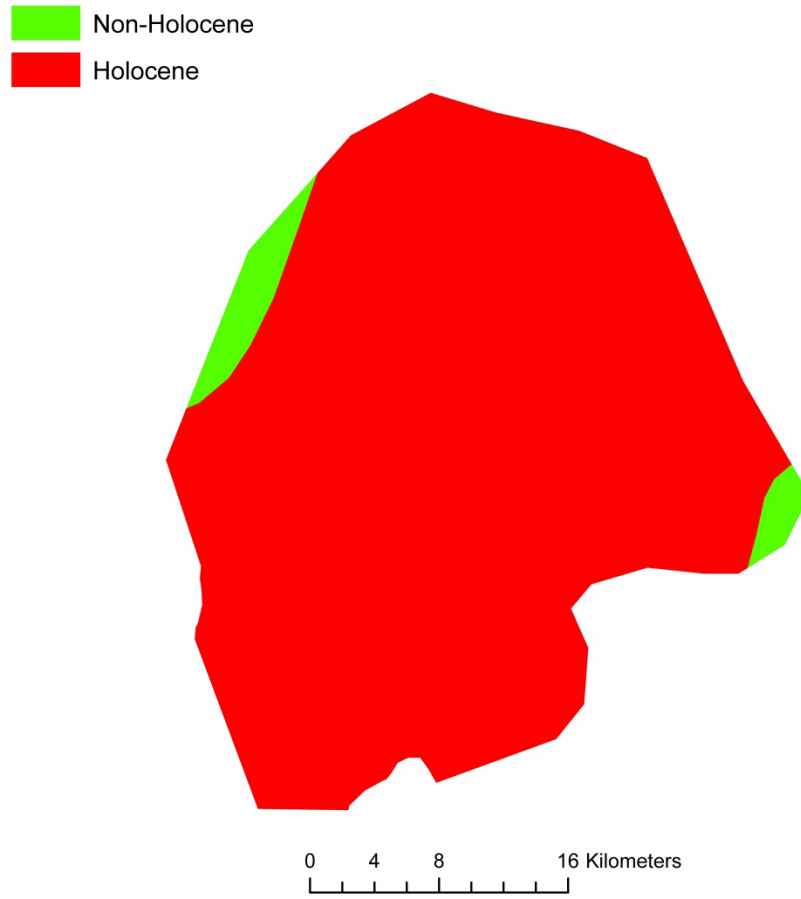

*Figure S2: Map of Mount Cameroon showing the Holocene and non-Holocene area.*

42 **Mount Etna (No.22)**

43 Mount Etna is located at a subduction zone in Italy. Its geological map was digitized  
 44 from Branca et al. (2011). The detailed description of the lithologies can be seen below  
 45 and provides a classification into Holocene, non-Holocene and Quaternary.

46 The Quaternary rocks are of an age of 15ka to 3.9ka, so that they have a time span of  
 47 11.1ka. Considering the Holocene time period going from 0 to 11.7 ka the amount of  
 48 Holocene coverage can be calculated by:

49 
$$\text{Holocene fraction} = (\text{Area Holocene} + (\text{Area Quaternary} \times (7.8\text{ka} / 11.1\text{ka}))) /$$
  
 50 
$$\text{Total Area}$$

51 resulting in a Holocene fraction area of 79.56%.

*Table S6: Classification of Etna basaltic rocks showing the original map data (first four columns) and our interpretation of the data ("System/Series").*

| <b>Symbo<br/>l</b> | <b>Name</b>                                                 | <b>Descriptio<br/>n</b>    | <b>Age</b>      | <b>System/Serie<br/>s</b> |
|--------------------|-------------------------------------------------------------|----------------------------|-----------------|---------------------------|
| 26u                | lava flows, cinder cones and bastions, and fall deposits    | basaltic to benmoreitic    | 4ka - 122 b.C.  | Holocene                  |
| 27-1               | Castings, cinder cones and bastions, and fall deposits      | basaltic to mugearitica    | 122 b.C. - 1669 | Holocene                  |
| 27-2               | Castings, cinder cones and bastions, and fall deposits      | basaltic to mugearitica    | 1669-1971       | Holocene                  |
| 27-3               | Lava flows, cinder cones and bastions, and fall deposits    | basaltic to mugearitica    | 1971-current    | Holocene                  |
| CB26u              | Cono e bastione di scorie                                   |                            |                 | Holocene                  |
| CB27-1             | Cono e bastione di scorie                                   |                            |                 | Holocene                  |
| CB27-2             | Cono e bastione di scorie                                   |                            |                 | Holocene                  |
| CB27-3             | Cono e bastione di scorie                                   |                            |                 | Holocene                  |
| 10a                | : intercalated flows in a powerful pyroclastic flow deposit | mugearitica                | nn              | non-Holocene              |
| 14                 | Succession of alternating flows in pyroclastic deposits     | hawaiiitica to mugearitica | nn              | non-Holocene              |
| 15                 | flows intercalated with clastic deposits                    | mugearitica to benmoreitic | nn              | non-Holocene              |
| 17                 | Casting interbedded with clastic deposits                   | benmoreite                 | nn              | non-Holocene              |
| 18                 | flows                                                       | mugearitica - benmoreitic  | nn              | non-Holocene              |

|     |                                                                                         |                            |               |              |
|-----|-----------------------------------------------------------------------------------------|----------------------------|---------------|--------------|
| 18a | bodies subvulcanici materials come from lavas                                           | mugearitica - benmoreitic  | nn            | non-Holocene |
| 1a  | bodies subvulcanici                                                                     |                            | nn            | non-Holocene |
| 21b | porfirichi flows                                                                        | hawaiiitica to mugearitica | nn            | non-Holocene |
| 22b | casting succession                                                                      | hawaiiitica                | nn            | non-Holocene |
| 24  | of breccia autoclastic often altered to hydrothermalism, associated with lava flows     | benmoreitic                | nn            | non-Holocene |
| 26b | deposit of debris avalanche monogenic, formed by lava mugearitica blocks                | nn                         | nn            | Quaternary   |
| 3b  | massive lava flows                                                                      | basaltic                   | nn            | non-Holocene |
| 1   | underwater transitional composition of volcanics in tholeiitica consist of pillow lavas | tholeiitica                | 542.2-496.1ka | non-Holocene |
| 10b | flows intercalated with breccias autoclastic and deposits epiclastici                   | hawaiiitica to mugearitica | 101.9ka       | non-Holocene |
| 11  | Breccie autoclastic and deposits epiclastici                                            | benmoreitic                | 107.2-99.1ka  | non-Holocene |
| 12  | deposits associated with pyroclastic flows                                              | mainly mugearitica         | 101.8-99.9ka  | non-Holocene |
| 13  | castings and slag deposits                                                              | hawaiiitica                | 93.0ka        | non-Holocene |
| 14a | subvulcanici bodies formed by lava massive                                              | mugearitica                | 85.3ka        | non-Holocene |
| 16  | : Casting intercalated with thin epiclastici deposits                                   | mugearitica to benmoreitic | 85.6ka        | non-Holocene |
| 19  | Thin flows to the base, followed by a thick succession pyroclastic                      | mugearitica                | 79.6-70.2ka   | non-Holocene |
| 2   | lava flows                                                                              | tholeiitica                | 332.4ka       | non-Holocene |
| 20  | Fall and pyroclastic flow deposits                                                      | hawaiiitica to benmoreitic | 56.6-41.3ka   | non-Holocene |
| 21a | massive flows and autoclastic interbedded with breccia deposits                         | hawaiiitica to mugearitica | 29.1-32.5ka   | non-Holocene |
| 22  | castings, scoria cones and fall deposits                                                | hawaiiitica to benmoreitic | 28.7-42.1ka   | non-Holocene |
| 22  | castings, scoria cones and fall deposits                                                | hawaiiitica to benmoreitic | 28.7-42.1ka   | non-Holocene |

|       |                                                                   |                            |               |              |
|-------|-------------------------------------------------------------------|----------------------------|---------------|--------------|
| 22    | castings, scoria cones and fall deposits                          | hawaiiitica to benmoreitic | 28.7-42.1ka   | non-Holocene |
| 22    | castings, scoria cones and fall deposits                          | hawaiiitica to benmoreitic | 28.7-42.1ka   | non-Holocene |
| 22    | castings, scoria cones and fall deposits                          | hawaiiitica to benmoreitic | 28.7-42.1ka   | non-Holocene |
| 22    | castings, scoria cones and fall deposits                          | hawaiiitica to benmoreitic | 28.7-42.1ka   | non-Holocene |
| 22    | castings, scoria cones and fall deposits                          | hawaiiitica to benmoreitic | 28.7-42.1ka   | non-Holocene |
| 25b   | reomorfiche flows                                                 | benmoreitic                | 15.4-15.0ka   | non-Holocene |
| 2a    | subvolcanico body structure                                       |                            | 320.0ka       | non-Holocene |
| 3a    | strongly altered lava flows                                       | basaltic                   | 180.2ka       | non-Holocene |
| 4a    | massive lava flows                                                | basaltic to mugaritica     | 154.9-129.9ka | non-Holocene |
| 4b    | thin lava flows                                                   | basaltic to mugaritica     | 134.2ka       | non-Holocene |
| 6     | Lave cataclasate                                                  | basaltic to mugaritica     | 128.7ka       | non-Holocene |
| 7     | Succession Lava                                                   | mugaritica                 | 126.4ka       | non-Holocene |
| 8     | Succession lava with thin interbedded deposits epiclastici        | hawaiiitica to mugaritica  | 121.2-111.9ka | non-Holocene |
| 9     | lava flows interbedded with massive deposits of local epiclastici | hawaiiitica to benmoreitic | 105.8ka       | non-Holocene |
| CB2   | Cono e bastione di scorie                                         |                            |               | non-Holocene |
| CB22  | Cono e bastione di scorie                                         |                            |               | non-Holocene |
| CB3a  | Cono e bastione di scorie                                         |                            |               | non-Holocene |
| CB7   | Cono e bastione di scorie                                         |                            |               | non-Holocene |
| 26l   | lava flows, cinder cones and bastions, and fall deposits          | basaltic to benmoreitic    | 15ka - 4 ka   | Quaternary   |
| CB26l | Cono e bastione di scorie                                         |                            |               | Quaternary   |

52

53

54

Table S7: Table showing the calculated areas for Mount Etna.

| Area Holocene (km <sup>2</sup> ) | Area non-Holocene (km <sup>2</sup> ) | Area Quaternary (km <sup>2</sup> ) | Total Area (km <sup>2</sup> ) | Holocene (%) |
|----------------------------------|--------------------------------------|------------------------------------|-------------------------------|--------------|
| 636.16                           | 123.90                               | 338.39                             | 1098.46                       | 79.56        |

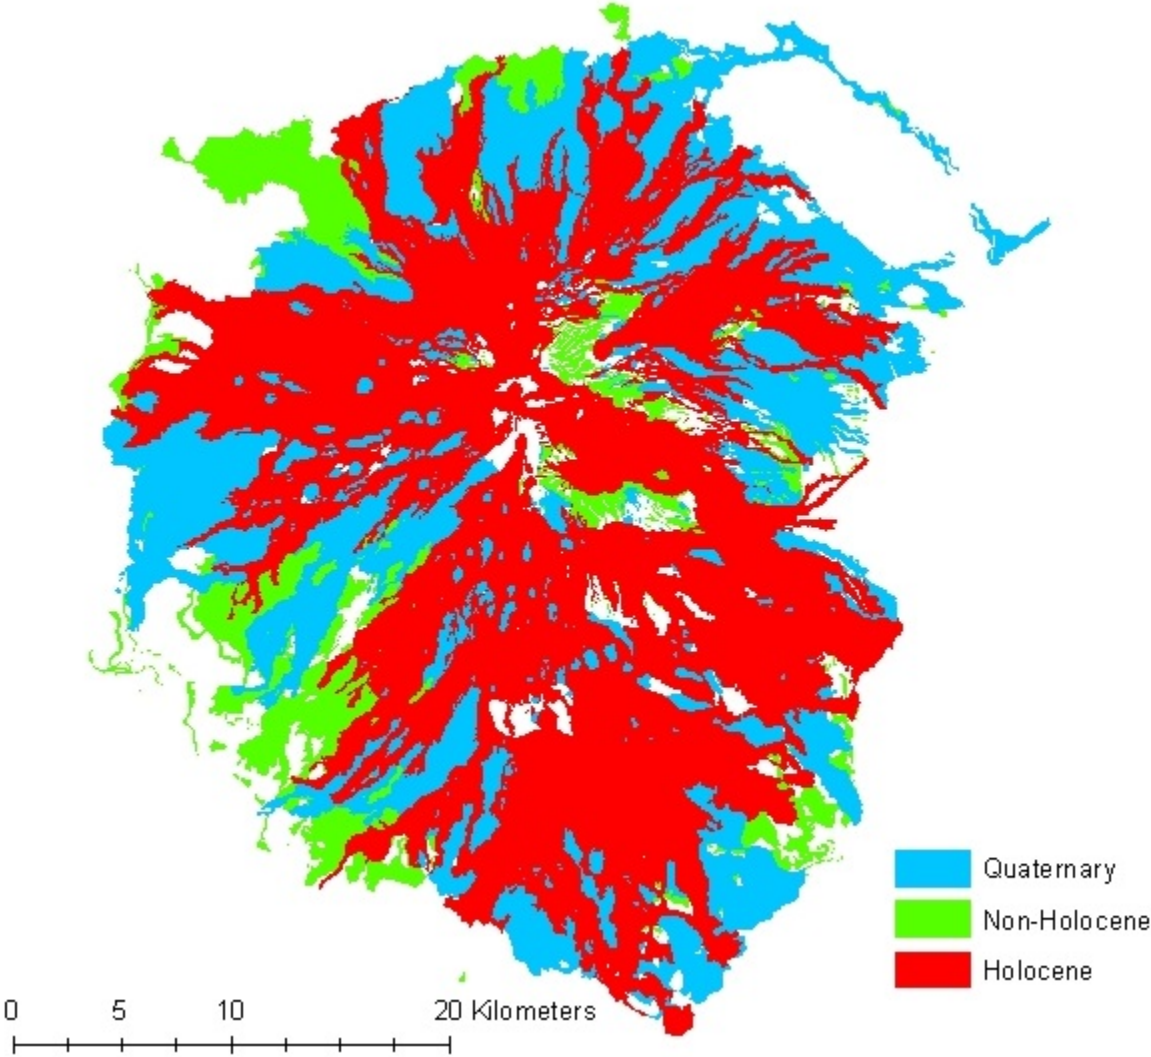

55

Figure S3: Map of Etna volcano showing the age distribution of basaltic rocks.

56

57 **Virunga (No.23)**

58 The Virunga Volcanic province is located in eastern central Africa and is related to the  
 59 East African Rift system. The geologic map of this area was compiled out of four  
 60 different maps from Smets et al. (2010), Balagizi et al. (2015), Petricec et al. (1971) and  
 61 De Mulder et al. (1986).

62 The western part of the province is classified as purely Holocene, whereas the volcanic  
 63 rocks become older to the east. Considering the Quaternary age period ranging from 0  
 64 to 2.58Ma, the Holocene percentage of the Quaternary area is calculated by the ratio of  
 65 11700a/2580000a. The total theoretical Holocene areal percentage is 48.02% using:

66 
$$\text{Holocene fraction} = (\text{Area Holocene} + (\text{Area Quaternary} \times (11700\text{a} / 2580000\text{a})))$$
  
 67 
$$/ \text{Total Area}$$

68

*Table S8: Classification of basaltic rocks in the Virunga province showing the individual volcanoes and our interpretation of their age.*

| <b>Id</b> | <b>Volcano</b>   | <b>System/Series</b> |
|-----------|------------------|----------------------|
| 0         | Nyiragongo       | Holocene             |
| 1         | Nyamuragira      | Holocene             |
| 2         | Muhabura         | Pleistocene          |
| 3         | Gahinga          | Pleistocene          |
| 4         | Muhabura-Gahinga | Pleistocene          |
| 5         | Sabinyo          | Pleistocene          |
| 6         | Sabinyo-Gahinga  | Pleistocene          |
| 7         | Bisoke           | Quaternary           |
| 8         | Karisimbi        | Quaternary           |
| 9         | Remaining areas  | Quaternary           |

69

*Table S9: Calculated areas for Virunga province.*

| <b>Area Holocene (km<sup>2</sup>)</b> | <b>Area Non-Holocene (km<sup>2</sup>)</b> | <b>Area Quaternary (km<sup>2</sup>)</b> | <b>Total Area (km<sup>2</sup>)</b> | <b>Holocene (%)</b> |
|---------------------------------------|-------------------------------------------|-----------------------------------------|------------------------------------|---------------------|
| 1518.62                               | 320.69                                    | 1335.72                                 | 3175.03                            | 48.02               |

70

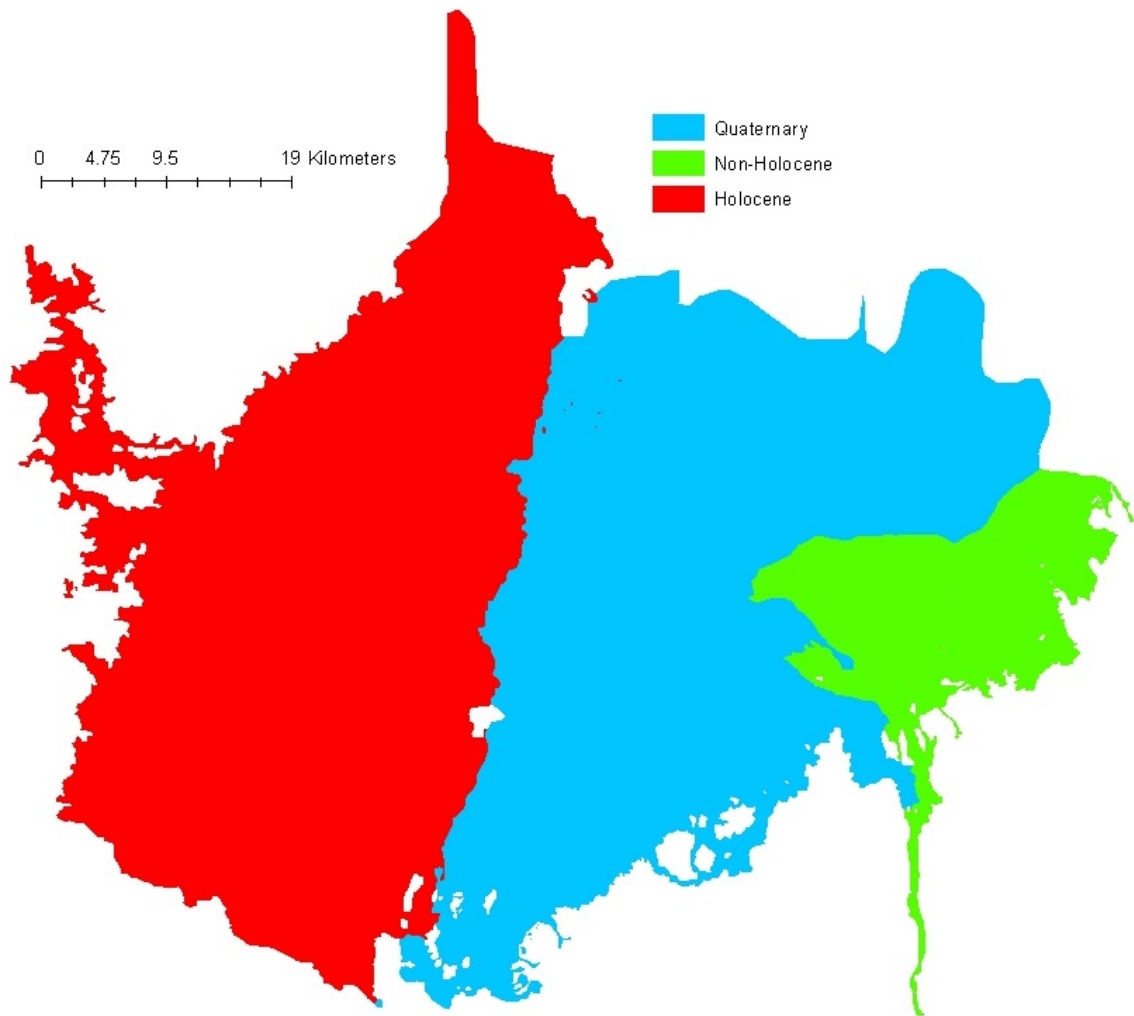

71

*Figure S4: Map of the Virunga province showing the different areas of basalt classified after age.*

72

73 **La Réunion (No.24)**

74 The volcanic island La Réunion belongs to a Hot Spot in the Indian Ocean and is  
 75 comprised of Holocene, non-Holocene and Quaternary volcanic rocks. The geological  
 76 map was digitized from Nehlig et al. (2006). The rocks can be divided into Holocene,  
 77 non-Holocene and two different types of Quaternary rocks (Qu1, Qu2):

78 Qu1: <340ka → Holocene fraction = 11.7ka/340ka

79 Qu2: 65ka – 5ka → Holocene fraction = 6.7ka/60ka

80 Thus, the total Holocene fraction can be derived by:

81 Holocene fraction = (Area Holocene + (Area Qu1 x (11.7ka / 340ka)) + (Area Qu2  
 82 x (6.7ka / 60ka))) / Total Area

83 providing a value of 28.13%.

84

*Table S10: Classification of the basaltic rocks of La Réunion with the original data (first three columns) and our interpretation (“System/Series”). Note that “nn” represents that the age of the lithology is not known.*

| ID      | Definition                        | Type                                                                                  | System/Series |
|---------|-----------------------------------|---------------------------------------------------------------------------------------|---------------|
| beta 4  | Coulées basaltiques               | Massif du Piton de La Fournaise - Série du bouclier ancien (450000 à 150000 ans)      | non-Holocene  |
| tfp     | Pitons et projections             | Massif du Piton de La Fournaise                                                       | nn            |
| beta 7  | Coulées basaltiques               | Massif du Piton de La Fournaise - Série de la Plaine des Cafres (65000 à 5000 ans)    | Quaternary2   |
| beta 6  | Coulées basaltiques               | Massif du Piton de La Fournaise - Série Plaine des Sables (65000 à 5000 ans)          | Quaternary2   |
| beta 8  | Coulées basaltiques               | Massif du Piton de La Fournaise - Série volcanique subactuelle (<5000 ans)            | Holocene      |
| beta 5  | Coulées basaltiques               | Massif du Piton de La Fournaise - Série des Remparts (150000 à 65000 ans)             | non-Holocene  |
| beta 3  | Coulées différenciées             | Massif du Piton de La Fournaise - Série alcaline anté-Fournaise (530000 à 450000 ans) | non-Holocene  |
| beta 8e | Coulées basaltiques dans l'Enclos | Massif du Piton de La Fournaise - Série volcanique subactuelle (<5000 ans)            | Holocene      |
| beta 1  | Coulées basaltiques               | Massif du Piton des Neiges - Série des océanites (>340000 ans)                        | non-Holocene  |



|           |                                                            |                                                                  |             |
|-----------|------------------------------------------------------------|------------------------------------------------------------------|-------------|
|           | à olivine                                                  |                                                                  |             |
| beta<br>2 | Coulées<br>(basalte,<br>hawaïtes,<br>mugéarites)           | Massif du Piton des Neiges - Série différenciée<br>(<340000 ans) | Quaternary1 |
| Br        | Brèches<br>d'avalanches<br>de débris<br>de Saint<br>Gilles | Massif du Piton des Neiges - Série différenciée<br>(<340000 ans) | Quaternary1 |
| pc        | Coulées<br>ignimbritiques                                  | Massif du Piton des Neiges - Série différenciée<br>(<340000 ans) | Quaternary1 |
| Tau       | Coulées<br>trachytiques<br>du plateau<br>de Belouve        | Massif du Piton des Neiges - Série différenciée<br>(<340000 ans) | Quaternary1 |

85

*Table S11: Summary of calculated areas of La Réunion.*

| <b>Area Holocene<br/>(km<sup>2</sup>)</b> | <b>Area non-<br/>Holocene (km<sup>2</sup>)</b> | <b>Area Quaternary<br/>(km<sup>2</sup>)</b> | <b>Total Area<br/>(km<sup>2</sup>)</b> | <b>Holocene<br/>(%)</b> |
|-------------------------------------------|------------------------------------------------|---------------------------------------------|----------------------------------------|-------------------------|
| 208.11                                    | 270.98                                         | 359.60                                      | 838.68                                 | 28.13                   |

86

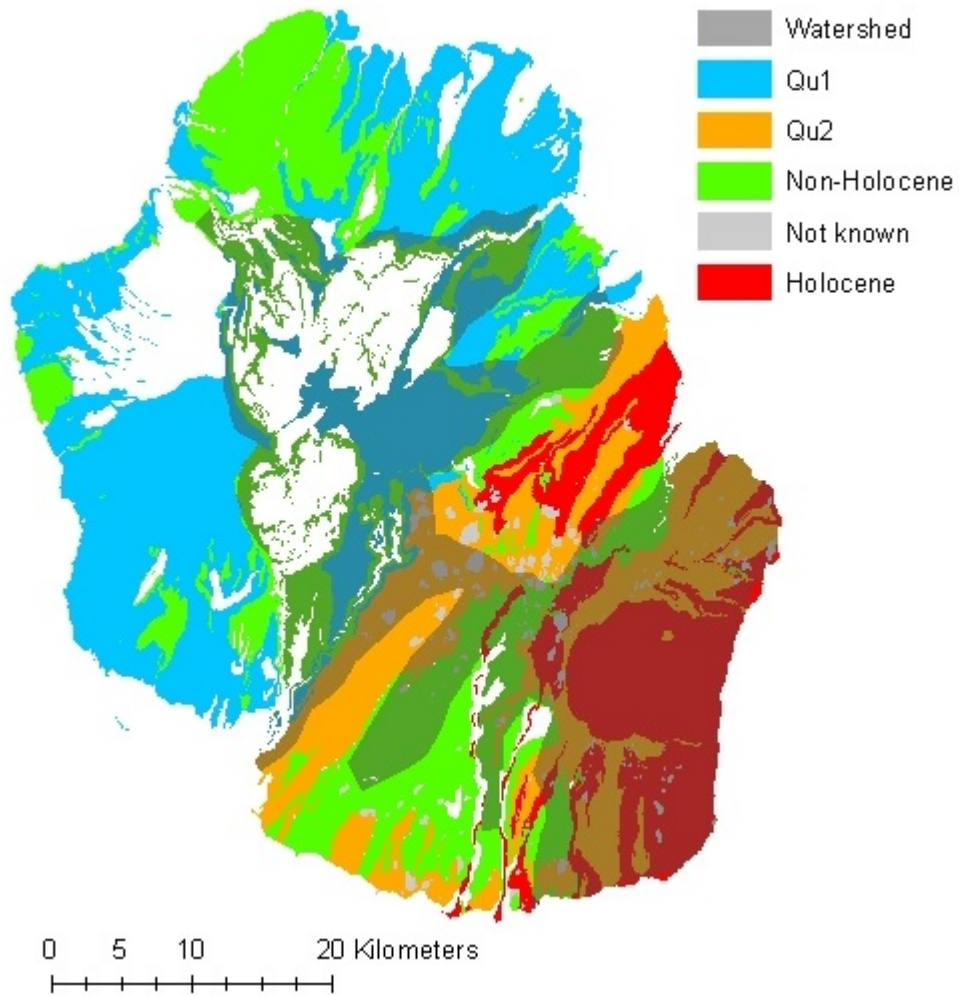

*Figure S5: Map of La Réunion showing the basaltic ages and additionally the watershed of the water samples. Only the watershed area was considered for this study.*

88

89 **Wudalianchi Lake (No.25)**

90 The basaltic rocks of Wudalianchi Lake are located in NE China and are of intraplate  
 91 volcanic origin. The Geomap of Wudalianchi region was digitized after a map of the  
 92 Ministry of Land and Resources of PRC, 2003 (unpublished work). The basalts can be  
 93 separated into Holocene and non-Holocene and thus provide a calculated Holocene  
 94 fraction of 14.82%.

95

*Table S12: Classification of basalt of Wudalianchi Lake with the original map data (first three columns) and our interpretation shown in the column "System/Series".*

| <b>Symbol</b> | <b>Litho</b> | <b>Age</b>         | <b>System/Series</b> |
|---------------|--------------|--------------------|----------------------|
| betaQ2w       | basalt       | middle pleistocene | non-Holocene         |
| betaQ1j       | basalt       | lower pleistocene  | non-Holocene         |
| betaQ2b       | basalt       | middle pleistocene | non-Holocene         |
| betaQ1g       | basalt       | tertiary           | non-Holocene         |
| betaQ42l      | basalt       | holocene           | Holocene             |

96

*Table S13: Calculated areas of Wudalianchi Lake.*

| <b>Area Holocene (km<sup>2</sup>)</b> | <b>Area non-Holocene (km<sup>2</sup>)</b> | <b>Area Quaternary (km<sup>2</sup>)</b> | <b>Total Area (km<sup>2</sup>)</b> | <b>Holocene (%)</b> |
|---------------------------------------|-------------------------------------------|-----------------------------------------|------------------------------------|---------------------|
| 69.68                                 | 400.35                                    | 0                                       | 470.04                             | 14.82               |

97

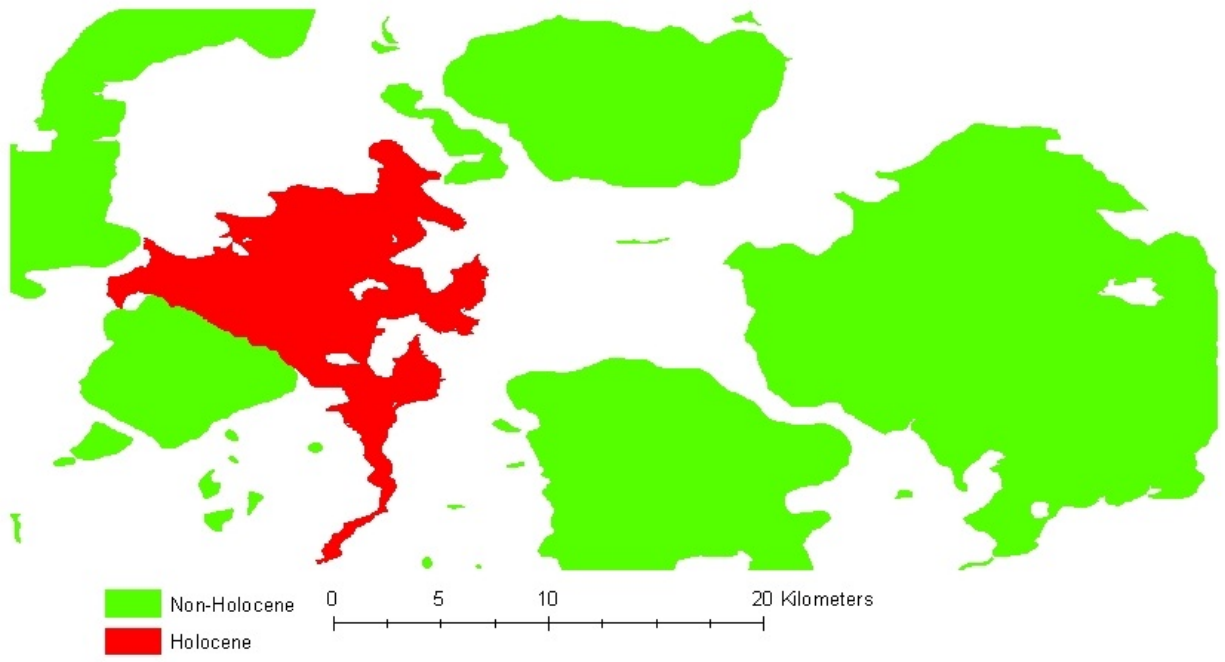

98

*Figure S6: Map of Wudalianchi Lake showing the distribution of Holocene basaltic rocks.*

99

100

101 **Japan (No.26)**

102 The geological data was derived of the Global Lithological Map (GLiM) by Hartmann  
 103 and Moosdorf (2012) but only the watersheds of sample locations were used, thus the  
 104 basaltic rocks can be divided into Holocene, non-Holocene and Quaternary rocks. The  
 105 calculation procedure of the Holocene fraction of Quaternary rocks is the same as for  
 106 the Virunga Province, and a final Holocene percentage of 8.70% is calculated.  
 107

*Table S14: Classification of basaltic rocks for Japan after the GLiM (first three columns) and our interpretation "System/Series".*

| <b>xx</b> | <b>Age_Min</b> | <b>Age_Max</b> | <b>System/Series</b> |
|-----------|----------------|----------------|----------------------|
| vb        | Holocene       | Holocene       | Holocene             |
| vb        | Neogene        | Neogene        | non-Holocene         |
| vb        | Paleogene      | Paleogene      | non-Holocene         |
| vb        | Paleozoic      | Proterozoic    | non-Holocene         |
| vb        | Pleistocene    | Pleistocene    | non-Holocene         |
| vb        | Pliocene       | Pliocene       | non-Holocene         |
| vb        | Quaternary     | Quaternary     | Quaternary           |

108

109

*Table S15: Calculated areas for Japan.*

| <b>Area Holocene (km<sup>2</sup>)</b> | <b>Area non-Holocene (km<sup>2</sup>)</b> | <b>Area Quaternary (km<sup>2</sup>)</b> | <b>Total Area (km<sup>2</sup>)</b> | <b>Holocene (%)</b> |
|---------------------------------------|-------------------------------------------|-----------------------------------------|------------------------------------|---------------------|
| 243.30                                | 2216.41                                   | 354.44                                  | 2814.15                            | 8.70                |

110

111

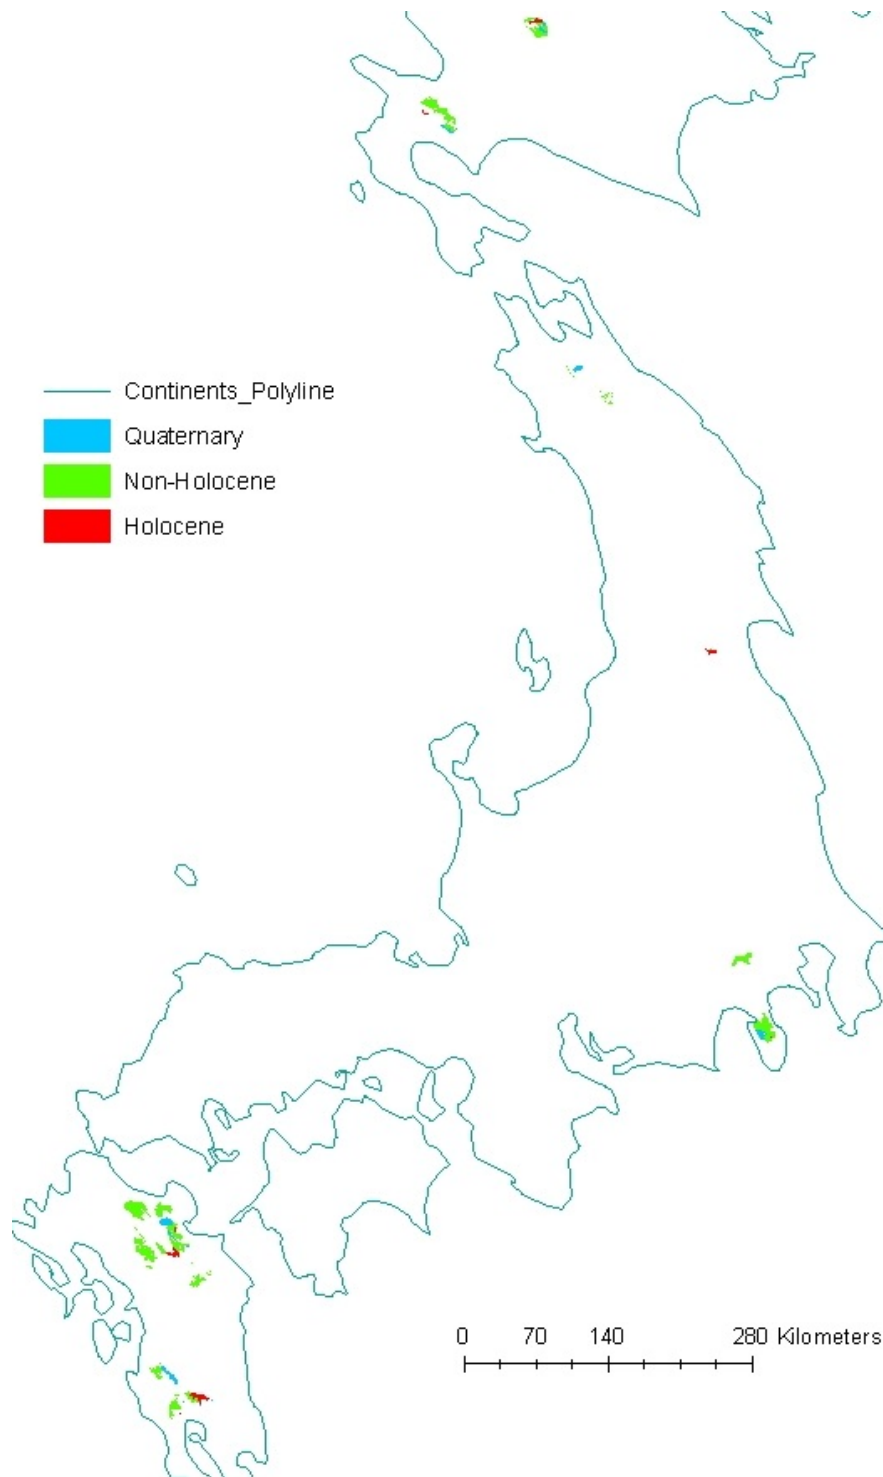

112

*Figure S7: Map showing the watersheds and age classification of basaltic rocks for Japan.*

113

114 **Kamchatka (No.27)**

115 The information of the basaltic rocks of the Kamchatka Peninsula is taken out of the  
 116 GLiM (Hartmann and Moosdorf, 2012) and provides age information of Holocene, non-  
 117 Holocene and Quaternary, where the Holocene fraction is again calculated as for the  
 118 Virunga province. The Holocene fraction of the watershed of the Kamchatka Peninsula  
 119 is 2.28%.

120

*Table S16: Classification of basaltic rocks of the Kamchatka Peninsula after the GLiM (first three columns) and our interpretation ("System/Series").*

| <b>Rock_Description</b>                    | <b>Age_Min</b>    | <b>Age_Max</b>    | <b>System/Series</b> |
|--------------------------------------------|-------------------|-------------------|----------------------|
| Basalte, Andesite und deren Tuffe          | Lower Quaternary  | Lower Quaternary  | non-Holocene         |
| Basalte, Andesite und deren Tuffe          | Middle Quaternary | Middle Quaternary | non-Holocene         |
| volcanogenic formations, basic composition | Pliocene          | Pliocene          | non-Holocene         |
| Basalte, Andesite und deren Tuffe          | Quaternary        | Quaternary        | Quaternary           |
| volcanogenic formations, basic composition | Upper Cretaceous  | Upper Cretaceous  | non-Holocene         |
| Basalte, Andesite und deren Tuffe          | Upper Quaternary  | Middle Quaternary | Quaternary           |
| Basalte, Andesite und deren Tuffe          | Upper Quaternary  | Upper Quaternary  | Holocene             |

121

*Table S17: Calculated areas of the Kamchatka Peninsula.*

| <b>Area Holocene (km<sup>2</sup>)</b> | <b>Area Non-Holocene (km<sup>2</sup>)</b> | <b>Area Quaternary (km<sup>2</sup>)</b> | <b>Total Area (km<sup>2</sup>)</b> | <b>Holocene (%)</b> |
|---------------------------------------|-------------------------------------------|-----------------------------------------|------------------------------------|---------------------|
| 183.60                                | 5588.34                                   | 2850.52                                 | 8622.46                            | 2.28                |

122

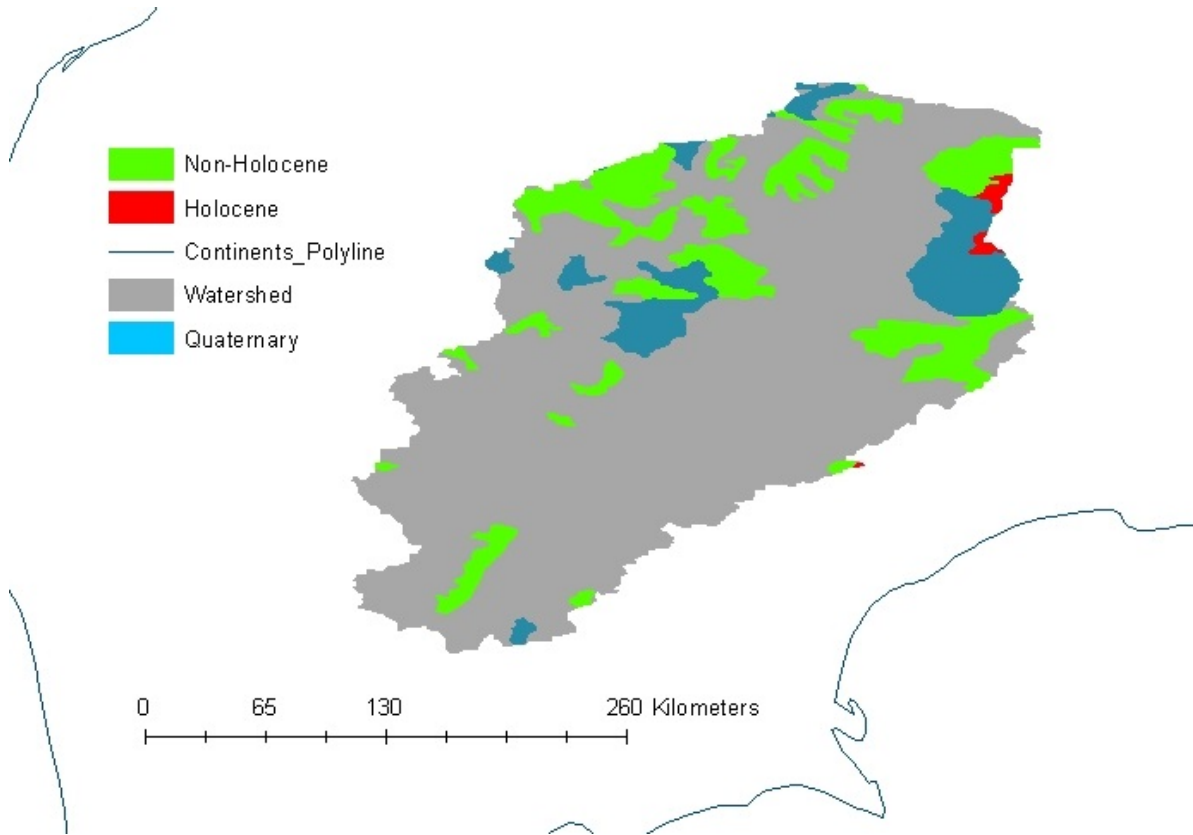

123

*Figure S8: Map showing the watershed of the Kamchatka Peninsula.*

124

125



126 **Taranaki (No.28)**

127 Taranaki volcano is located in the southern part of the Northern Island of New Zealand.  
128 Price et al. (1992) define four different regions of the Taranaki Volcanics (Paritutu,  
129 Kaitake, Pouakai and Egmont), where Mt. Egmont is the youngest. After Neall et al.  
130 (1986) the cone of Mt. Egmont represents about 8% of the total eruptive mass and is of  
131 an age of about 10ka (Holocene).

132

133 **Big Island, Hawaii (No.29)**

134 The geological map of the Big Island of Hawaii was digitized after an original map of  
 135 Stearns and Macdonald (1946). Besides a separation into Holocene and non-Holocene  
 136 rocks, two different types of Quaternary rocks exist:

137 Qu1: Hualalai Volcano: fraction Holocene = Area Qu1 x (11700a / 2580000a)

138 Qu2: Kilauea and Mauna Loa Volcano: fraction Holocene = Area Qu2 x (11700a /  
 139 126000a) with an assumption of "Latest Pleistocene" = Upper Pleistocene  
 140 (0.126Ma).

141 In total, a Holocene fraction of 13.73% was calculated.

142

*Table S18: Classification of the basaltic rocks of the Big Island of Hawaii after Stearns and Macdonald (1946) and our interpretation ("System/Series").*

| <b>Id</b> | <b>Volcano</b>    | <b>Description</b>                                 | <b>Age</b>                    | <b>System/Series</b> |
|-----------|-------------------|----------------------------------------------------|-------------------------------|----------------------|
| 0         | Kohala Mountain   | Hawi Volcanic Series                               | Pleistocene                   | non-Holocene         |
| 1         | Kohala Mountain   | Pololu Volcanic Series                             | Pliocene and older            | non-Holocene         |
| 2         | Mauna Kea Volcano | Recent lavas                                       | Holocene                      | Holocene             |
| 3         | Mauna Kea Volcano | Pleistocene lavas                                  | Pleistocene                   | non-Holocene         |
| 4         | Mauna Kea Volcano | Hamakua Volcanic Series, capped by Pahala ash      | Pleistocene                   | non-Holocene         |
| 5         | Hualalai Volcano  | Historic lavas                                     | Holocene                      | Holocene             |
| 6         | Hualalai Volcano  | Prehistoric lavas                                  | Quaternary                    | Quaternary1          |
| 7         | Hualalai Volcano  | Waawaa Volcanics (pumice cone, trachyte lava flow) | Pleistocene                   | non-Holocene         |
| 8         | Kilauea Volcano   | Historic lavas                                     | Holocene                      | Holocene             |
| 9         | Kilauea Volcano   | Prehistoric lavas                                  | Recent and latest Pleistocene | Quaternary2          |
| 10        | Kilauea Volcano   | Hilina Volcanic Series, capped by Pahala ash       | Pleistocene                   | non-Holocene         |
| 11        | Mauna Loa Volcano | Historic lavas                                     | Holocene                      | Holocene             |
| 12        | Mauna Loa Volcano | Prehistoric lavas                                  | Recent and latest Pleistocene | Quaternary2          |
| 13        | Mauna Loa Volcano | Kahuku Volcanic Series, capped by Pahala ash       | Pleistocene                   | non-Holocene         |

|    |                   |                        |                   |              |
|----|-------------------|------------------------|-------------------|--------------|
| 14 | Mauna Loa Volcano | Ninole Volcanic Series | Pliocene or older | non-Holocene |
|----|-------------------|------------------------|-------------------|--------------|

143

*Table S19: Summary of the calculated areas for the Big Island of Hawaii.*

| Area Holocene (km <sup>2</sup> ) | Area Non-Holocene (km <sup>2</sup> ) | Area Quaternary (km <sup>2</sup> ) | Total Area (km <sup>2</sup> ) | Holocene (%) |
|----------------------------------|--------------------------------------|------------------------------------|-------------------------------|--------------|
| 929.17                           | 3357.53                              | 6252.29                            | 10539.00                      | 13.73        |

144

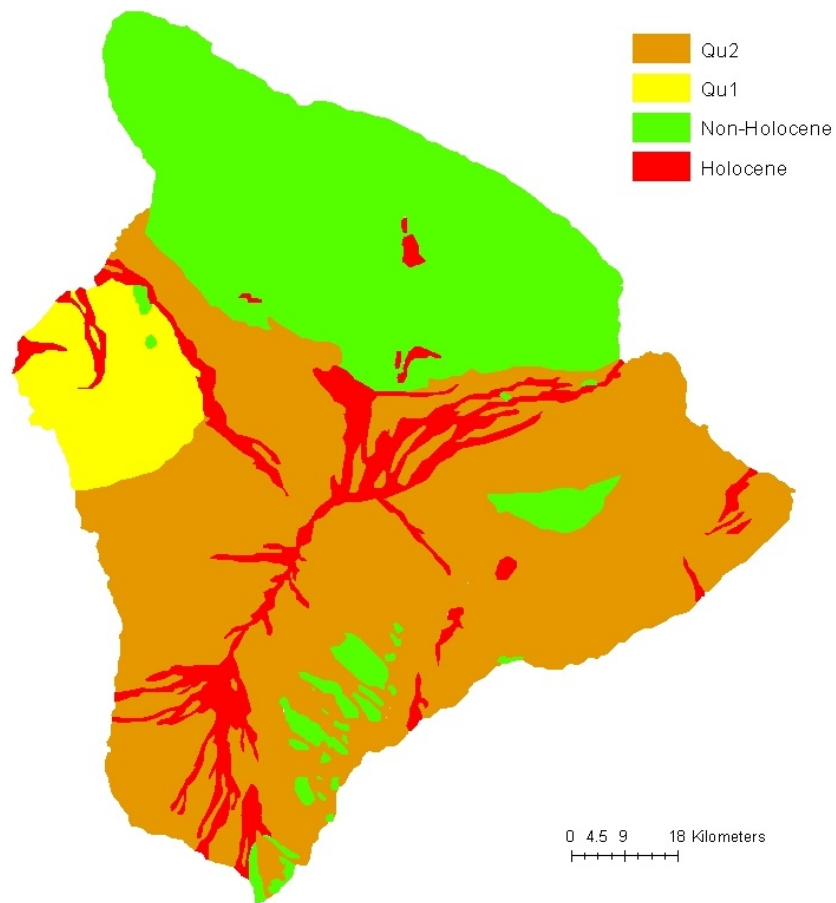

145

*Figure S9: Map of the Big Island of Hawaii showing the different age distributions of basaltic rocks.*

146

147 **High Cascades (No.30)**

The geological information for the High Cascades was derived of the GLiM by Hartmann and Moosdorf (2012) and results in a Holocene fraction of 0.20%.

*Table S20: Classification of the basaltic rocks of the High Cascades Region after the Global Lithological Map (first three columns) and our interpretation (“System/Series”).*

| <b>Rock Description</b>                | <b>Age_Min</b>               | <b>Age_Max</b>               | <b>System/Series</b> |
|----------------------------------------|------------------------------|------------------------------|----------------------|
| basalt;                                | Early to Middle Miocene      | Early to Middle Miocene      | non-Holocene         |
| tholeiite; siltstone                   | Eocene                       | Eocene                       | non-Holocene         |
| basalt; andesite                       | Late Eocene to Oligocene     | Late Eocene to Oligocene     | non-Holocene         |
| mafic volcanic rock;                   | Late Miocene to Pliocene     | Late Miocene to Pliocene     | non-Holocene         |
| basalt; volcanic breccia (agglomerate) | Middle Eocene to Late Eocene | Middle Eocene to Late Eocene | non-Holocene         |
| basalt (tholeiite); andesite           | Middle Miocene               | Middle Miocene               | non-Holocene         |
| basalt;                                | Middle Miocene               | Middle Miocene               | non-Holocene         |
| andesite; basalt                       | Middle to Late Miocene       | Middle to Late Miocene       | non-Holocene         |
| basalt; andesite                       | Miocene                      | Miocene                      | non-Holocene         |
| basalt; rhyolite                       | Miocene-Pliocene             | Miocene-Pliocene             | non-Holocene         |
| basalt; volcanic breccia (agglomerate) | Oligocene to Miocene         | Oligocene to Miocene         | non-Holocene         |
| basalt; andesite                       | Pleistocene to Holocene      | Pleistocene to Holocene      | Quaternary           |
| basalt; andesite                       | Pliocene to Pleistocene      | Pliocene to Pleistocene      | non-Holocene         |
| andesite; basalt                       | Quaternary                   | Quaternary                   | Quaternary           |
| andesite; basalt                       | Tertiary (2-24 Ma)           | Tertiary (2-24 Ma)           | non-Holocene         |
| Andesite; basalt                       | Miocene                      | Miocene                      | non-Holocene         |

148

149

*Table S21: Summarized area calculation for the watersheds of the High Cascades.*

| <b>Area Holocene (km<sup>2</sup>)</b> | <b>Area Non-Holocene (km<sup>2</sup>)</b> | <b>Area Quaternary (km<sup>2</sup>)</b> | <b>Total Area (km<sup>2</sup>)</b> | <b>Holocene (%)</b> |
|---------------------------------------|-------------------------------------------|-----------------------------------------|------------------------------------|---------------------|
| 0                                     | 3033.92                                   | 2479.39                                 | 5513.31                            | 0.20                |

150

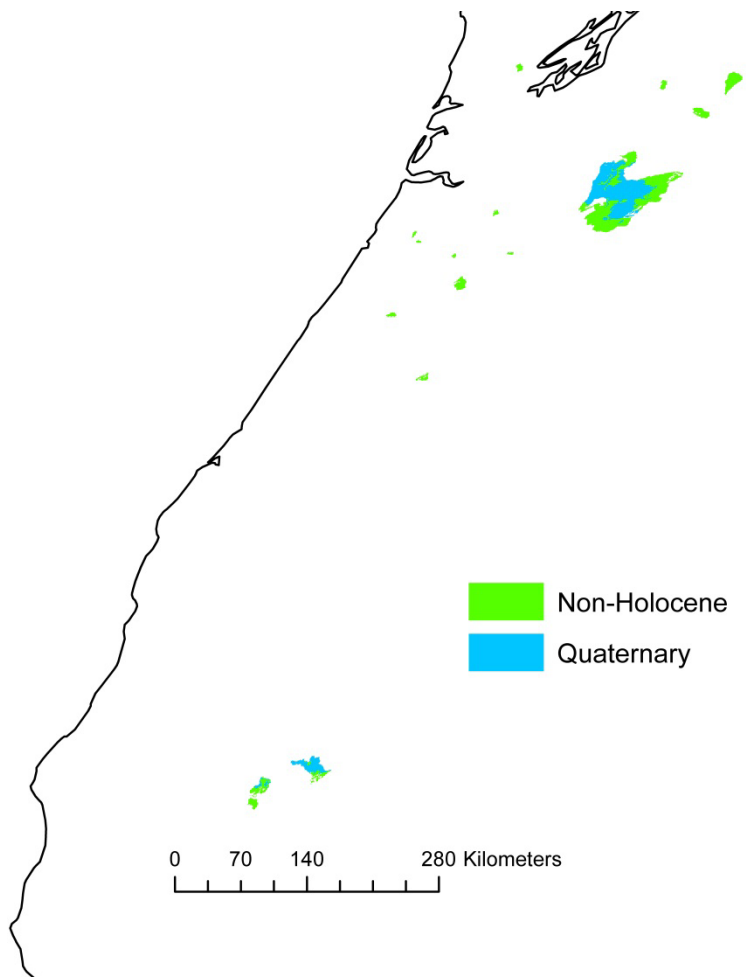

151

*Figure S10: Map of the watersheds of the High Cascades.*

152

153 **Sao Miguel (No.31)**

154 Sao Miguel is related to a Hot Spot in the northern Atlantic. The geological map was  
 155 digitized after Moore (1990). There are only two watersheds considered in this study  
 156 and the age of the basaltic rocks can be divided into two different Quaternary classes:

157 Qu1: fraction Holocene = Area Qu1 x (11700a / 200000a) (Agua de Pau Volcano,  
 158 0-200ka)

159 Qu2: fraction Holocene = Area Qu2 x (11700a / 100000a) (Furnas Volcano, 0-  
 160 100ka)

161

*Table S22: Classification of the basaltic rocks of Sao Miguel from the original data and our interpretation ("System/Series").*

| <b>Id</b> | <b>Name</b>         | <b>Type</b>            | <b>Age</b> | <b>System/Series</b> |
|-----------|---------------------|------------------------|------------|----------------------|
| 2         | Agua de Pau Volcano | trachyte stratovolcano | 0-200ka    | Quaternary1          |
| 4         | Furnas Volcano      | trachyte stratovolcano | 0-100ka    | Quaternary2          |

162

*Table S23: Summary of the calculated areas of the watersheds of Sao Miguel.*

| <b>Area Holocene (km<sup>2</sup>)</b> | <b>Area Non-Holocene (km<sup>2</sup>)</b> | <b>Area Quaternary (km<sup>2</sup>)</b> | <b>Total Area (km<sup>2</sup>)</b> | <b>Holocene (%)</b> |
|---------------------------------------|-------------------------------------------|-----------------------------------------|------------------------------------|---------------------|
| 0                                     | 0                                         | 47.04                                   | 47.04                              | 9.35                |

163

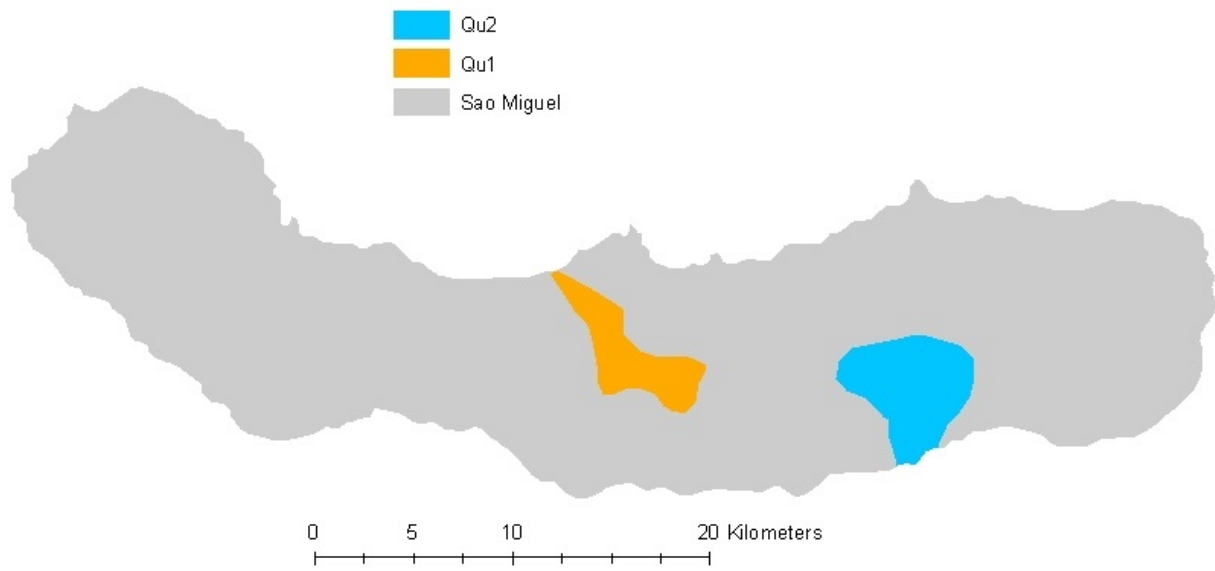

164

*Figure S11: Map of Sao Miguel showing the two watersheds considered in this study.*

165

166 **Iceland (No.32)**

167 The information of the basaltic rocks of Iceland are derived from the GLiM (Hartmann  
 168 and Moosdorf, 2012) and can be classified into Holocene, non-Holocene and  
 169 Quaternary (for the calculation see Virunga Province) and results in a Holocene  
 170 coverage of 13.19%.

171

*Table S24: Description of the basaltic rocks of Iceland after the GLiM (first three columns) and our interpretation (“System/Series”).*

| <b>Rock_Description</b>                                                                  | <b>Age_Min</b>                                 | <b>Age_Max</b>                                 | <b>System/Series</b> |
|------------------------------------------------------------------------------------------|------------------------------------------------|------------------------------------------------|----------------------|
| Basalt and andesite                                                                      | Holocene<br>(postglacial time)                 | Holocene<br>(postglacial time)                 | Holocene             |
| Basic and intermediate<br>hyaloclastites, lavas and<br>associated sediments              | Late Pleistocene                               | Late Pleistocene                               | non-Holocene         |
| Basic and intermediate lavas<br>and pyroclastic rocks (mainly<br>hyaloclastite)          | Late Pliocene,<br>Early Pleistocene,<br>3.3 -  | Late Pliocene,<br>Early Pleistocene,<br>3.3 -  | non-Holocene         |
| Ocean-floor basalt; on land<br>also intermediate volcanic<br>rocks and sedimentary rocks | Miocene                                        | Miocene                                        | non-Holocene         |
| Basic and intermediate<br>volcanic rocks with<br>intercalated sedimentary<br>rocks       | Miocene-Early<br>Pliocene, older<br>than 3.3 M | Miocene-Early<br>Pliocene, older<br>than 3.3 M | non-Holocene         |
| Ocean-floor basalt                                                                       | Pliocene                                       | Pliocene                                       | non-Holocene         |
| Ocean-floor basalt                                                                       | Quaternary                                     | Quaternary                                     | Quaternary           |

172

*Table S25: Summary of the area calculation for Iceland.*

| <b>Area Holocene<br/>(km<sup>2</sup>)</b> | <b>Area Non-<br/>Holocene (km<sup>2</sup>)</b> | <b>Area Quaternary<br/>(km<sup>2</sup>)</b> | <b>Total Area<br/>(km<sup>2</sup>)</b> | <b>Holocene<br/>(%)</b> |
|-------------------------------------------|------------------------------------------------|---------------------------------------------|----------------------------------------|-------------------------|
| 13196.86                                  | 86773.61                                       | 104.36                                      | 100075.00                              | 13.19                   |

173

174



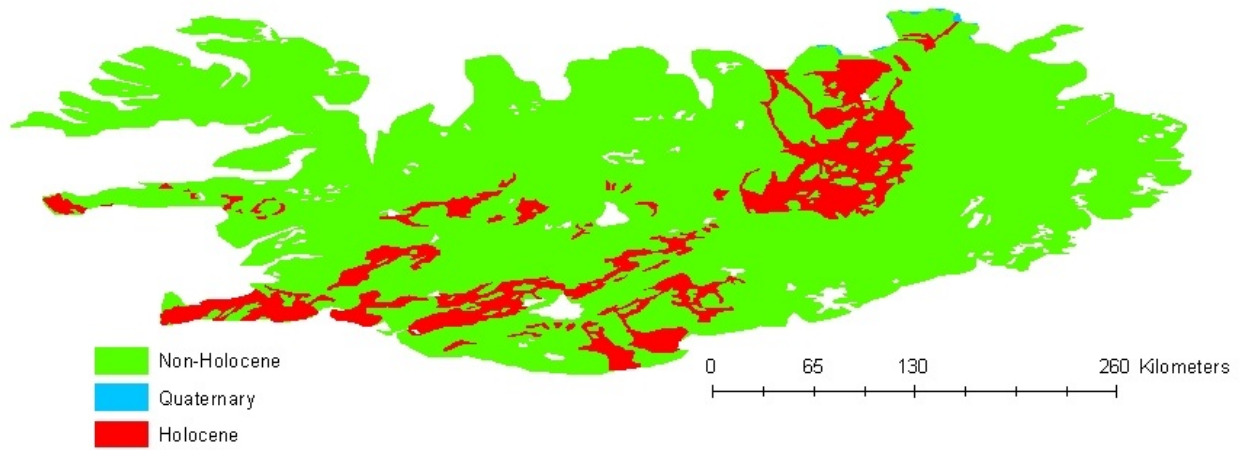

175

*Figure S12: Map of Iceland showing the distribution of the age of basaltic rocks.*

176

177 **Tianchi Lake (No.33)**

178 The geological map of the Tianchi Lake region was derived by Paone and Yun (2016).  
 179 The basalts can be directly separated into Holocene and non-Holocene age. The total  
 180 basaltic area is 11.31 km<sup>2</sup> and a Holocene fraction area of 65.34% can be calculated.  
 181 The value for the runoff was calculated from Fekete et al. (2002).

182

*Table S26: Description of the basaltic rocks of Tianchi Lake after Paone and Yun (2016)(first column) and our interpretation (“System/Series”).*

| <b>Description</b>                                               | <b>System/Series</b> |
|------------------------------------------------------------------|----------------------|
| second fan-shaped debris flow - Holocene                         | Holocene             |
| Rock-fall deposit - Holocene?                                    | Holocene             |
| 1668 dark trachytic ignimbrite and surge - Holocene              | Holocene             |
| third fan-shaped debris flow - Holocene                          | Holocene             |
| 1903 phreatomagmatic eruption - Holocene                         | Holocene             |
| Baitoushan III upper trachyte cone with comendite, 0.02-0.22 Ma  | non-Holocene         |
| Baithoushan II middle trachyte cone and ignimbrite, 0.25-0.44 Ma | non-Holocene         |

*Table S27: Summary of the area calculation for Tianchi Lake.*

| <b>Area Holocene<br/>(km<sup>2</sup>)</b> | <b>Area non-Holocene<br/>(km<sup>2</sup>)</b> | <b>Area<br/>Quaternary<br/>(km<sup>2</sup>)</b> | <b>Total Area<br/>(km<sup>2</sup>)</b> | <b>Holocene<br/>(%)</b> |
|-------------------------------------------|-----------------------------------------------|-------------------------------------------------|----------------------------------------|-------------------------|
| 7.39                                      | 3.92                                          | 0                                               | 11.31                                  | 65.34                   |

183

184

185

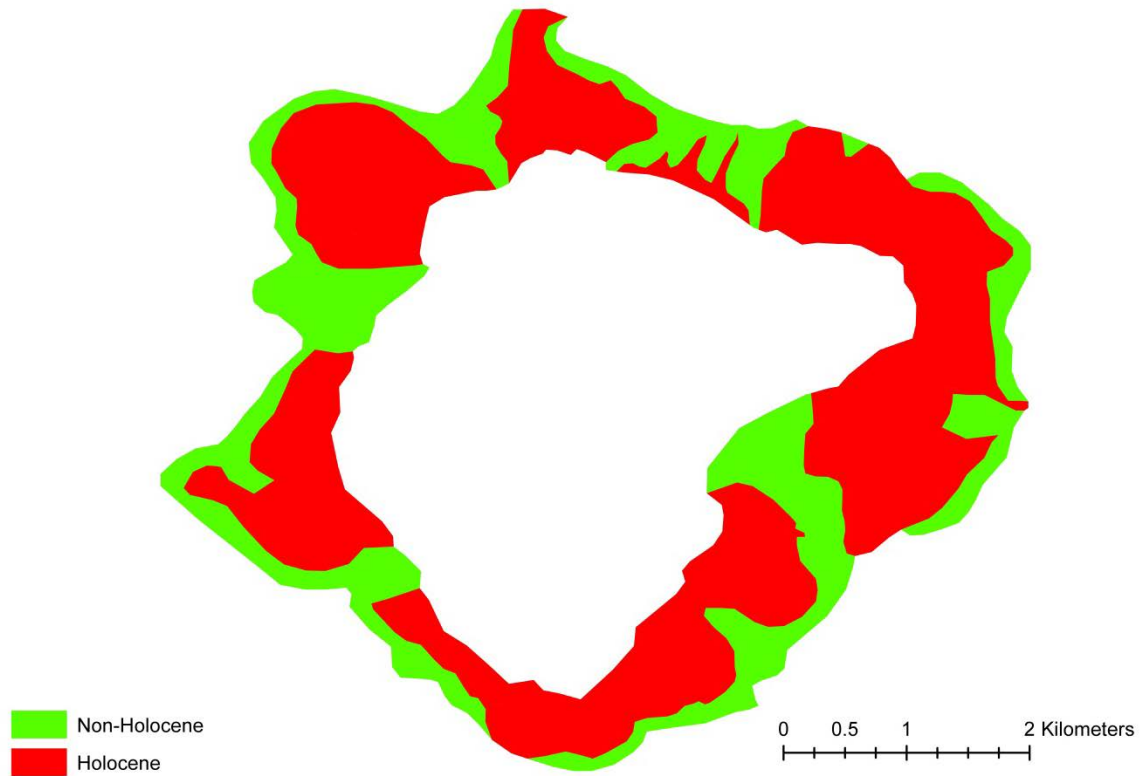

*Figure S13: Map of Tianchi Lake and its surrounding lithology showing the distribution of the age of basaltic rocks.*

186 **Part Two: Additional information on relations among studied parameters**  
187 In addition to results provided in the main text further relationships among applied  
188 parameters are shown.

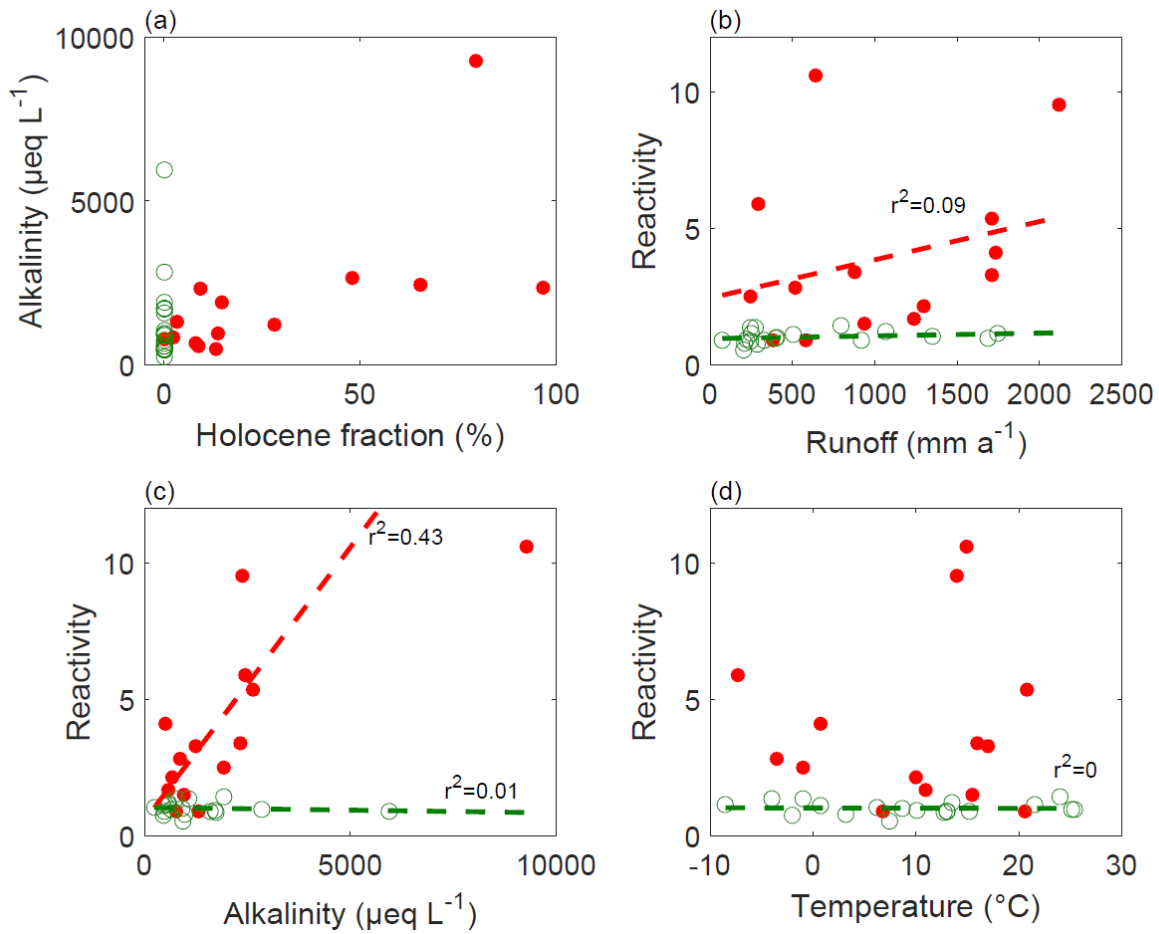

189

190 *Figure 14S: Scatterplot relationships between alkalinity, Holocene fraction, reactivity*  
191 *and temperature. a) Holocene fraction versus alkalinity concentrations. Green: IVFs,*  
192 *red: AVFs. b) Reactivity versus runoff: The green regression line (IVFs) suggests almost*  
193 *no correlation of reactivity with runoff, also for the AVFs no significant correlation is*  
194 *identified (coefficient of determination  $r^2=0.09$  and slope of  $0.001$  with reactivity units per*  
195 *mm runoff  $a^{-1}$ ; excluding Mt. Etna and Mt. Cameroon). c) Reactivity versus alkalinity*  
196 *concentration: Excluding Mt. Etna, a coefficient of determination  $r^2 = 0.43$  exists,*  
197 *suggesting an increase in reactivity due to elevated alkalinity concentration for AVFs. d)*  
198 *Reactivity versus temperature suggests no bias of reactivity due to a temperature effect*  
199 *for AVFs, as reactivity is based on a temperature normalized parameterization. For the*  
200 *IVFs ( $r^2=0$ ) no bias with temperature can be identified due to the good correlation of*  
201 *alkalinity fluxes with land surface temperature (green line).*

202



203 **Part Three: Description of the global calculations**

204

205 For the global calculations of alkalinity fluxes, temperature data from Hijmans et al.  
206 (2005) and runoff data from Fekete et al. (2002) were used, as well as a global basalt  
207 map, mostly based on the GLiM (Fig. S15) distinguishing areas considering Holocene  
208 area fractions for the calculations (Cenozoic) and non-Cenozoic basaltic areas.

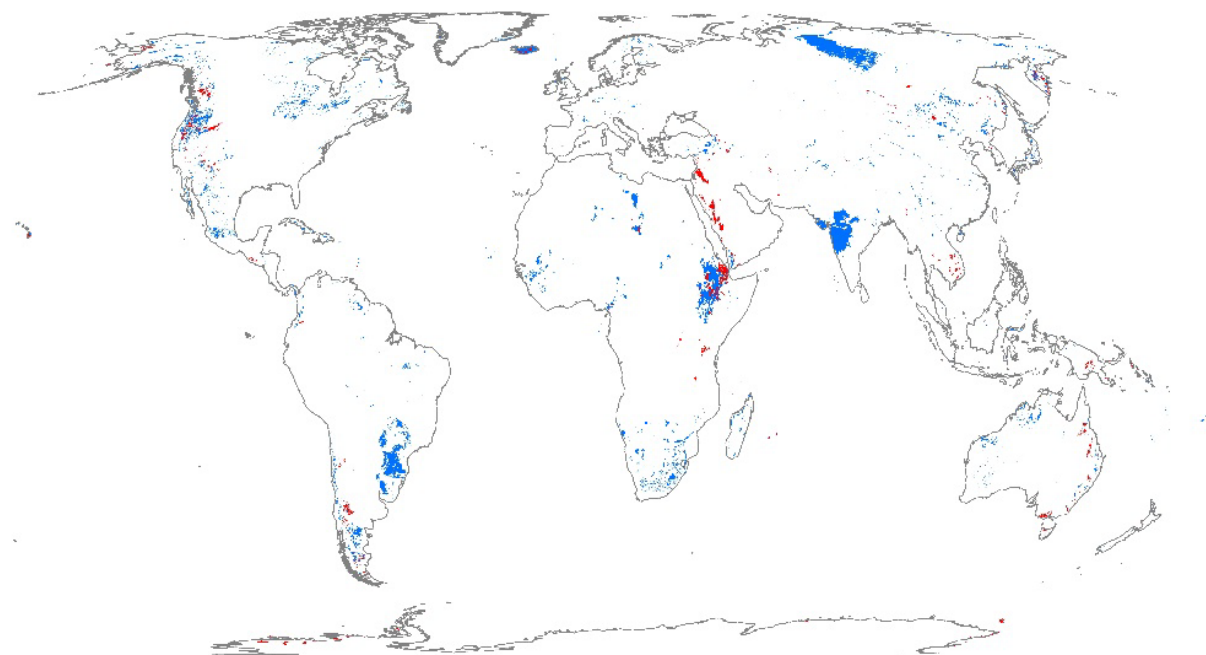

209

210 *Figure S15: Global distribution of basalt areas distinguishing Cenozoic (red) and Non-*  
211 *Cenozoic areas (blue). The reported Holocene fractions of the Cenozoic areas are*  
212 *considered in the global calculation. Some areas with missing age information may*  
213 *result in a smaller global Holocene area fraction than applied for global calculations.*

Table S29: Global calculations of CO<sub>2</sub> consumption for areas with a runoff >74mm/a. As reference previous global empirical equations (Bluth and Kump, 1994; Dessert et al., 2003; Goll et al., 2014; Suchet and Probst, 1995) were used to derive CO<sub>2</sub> consumption values.

|                                                  | Total Area [km <sup>2</sup> ] | Holocene Area [km <sup>2</sup> ] | % of global basalt area | CO <sub>2</sub> consumption [10 <sup>6</sup> mol/a] |                      |                               |                    |                  | Area [km <sup>2</sup> ] for q>74mm/a | Holocene area [km <sup>2</sup> ] for q>74mm/a |
|--------------------------------------------------|-------------------------------|----------------------------------|-------------------------|-----------------------------------------------------|----------------------|-------------------------------|--------------------|------------------|--------------------------------------|-----------------------------------------------|
|                                                  |                               |                                  |                         | Goll et al., 2014                                   | Dessert et al., 2003 | Amiotte-Suchet & Probst, 1995 | Bluth & Kump, 1994 | New equation     |                                      |                                               |
| Fluxes from purely Holocene areas                | 55,949                        | 55,949                           | 1.05                    | 17,138                                              | 19,388               | 15,511                        | 11,512             | 115,206          | 33,785                               | 33,785                                        |
| Raster with Holocene influence (Cenozoic)        | 932,137                       | 55,949                           | 17.46                   | 233,458                                             | 247,648              | 118,919                       | 93,678             | 314,148          | 359,190                              | 33,785                                        |
| Raster without Holocene influence (Non-Cenozoic) | 4,406,263                     | -                                | 82.54                   | 1,237,066                                           | 1,319,226            | 719,451                       | 645,354            | 1,677,456        | 3,032,768                            | -                                             |
| <b>TOTAL</b>                                     | <b>5,338,400</b>              | <b>55,949</b>                    | <b>100.00</b>           | <b>1,470,525</b>                                    | <b>1,566,874</b>     | <b>838,371</b>                | <b>739,032</b>     | <b>1,991,604</b> | <b>3,391,958</b>                     | <b>33,785</b>                                 |

Table S30: Global calculations without runoff restriction.

214

|                                                  | Total Area [km <sup>2</sup> ] | Holocene Area [km <sup>2</sup> ] | % of global basalt area | CO <sub>2</sub> consumption [10 <sup>6</sup> mol/a] |                      |                               |                    |                  |
|--------------------------------------------------|-------------------------------|----------------------------------|-------------------------|-----------------------------------------------------|----------------------|-------------------------------|--------------------|------------------|
|                                                  |                               |                                  |                         | Goll et al., 2014                                   | Dessert et al., 2003 | Amiotte-Suchet & Probst, 1995 | Bluth & Kump, 1994 | New equation     |
| Fluxes from purely Holocene areas                | 55,949                        | 55,949                           | 1.05                    | 17,227                                              | 19,484               | 15,564                        | 11,701             | 249,201          |
| Raster with Holocene influence (Cenozoic)        | 932,137                       | 55,949                           | 17.46                   | 234,714                                             | 249,063              | 119,831                       | 96,017             | 805,917          |
| Raster without Holocene influence (Non-Cenozoic) | 4,406,263                     | -                                | 82.54                   | 1,241,945                                           | 1,324,164            | 722,929                       | 657,897            | 2,625,217        |
| <b>TOTAL</b>                                     | <b>5,338,400</b>              | <b>55,949</b>                    | <b>100.00</b>           | <b>1,476,659</b>                                    | <b>1,573,227</b>     | <b>842,760</b>                | <b>753,915</b>     | <b>3,431,134</b> |

215



216 A new global basalt map was derived by the combination of several different input  
 217 datasets. Main input is from the Global Lithological Map (GLiM) (Hartmann and  
 218 Moosdorf, 2012) whereas new data comes from geological maps that were considered  
 219 for the development of the Global Unconsolidated Sediments Map (GUM) (Börker et al.,  
 220 2018) and the individual active volcanoes described in this study. For the individual  
 221 calculation of Holocene percentages see following tables.

*Table S29: Table showing the Ages of the basaltic fields of the GLiM with the authors interpretation (third column).*

| <b>Age_Min</b>                          | <b>Age_Max</b>                          | <b>HoloceneArea</b> |
|-----------------------------------------|-----------------------------------------|---------------------|
| Early Pleistocene                       | Early Pleistocene                       | 0                   |
| Himalayan Pleistocene                   | Himalayan Pleistocene                   | 0                   |
| Late Miocene to Pleistocene             | Late Miocene to Pleistocene             | 0                   |
| Late Pleistocene                        | Late Pleistocene                        | 0                   |
| Late Pliocene, Early Pleistocene, 3.3 - | Late Pliocene, Early Pleistocene, 3.3 - | 0                   |
| Lower Quaternary                        | Lower Quaternary                        | 0                   |
| Lower Quaternary                        | Miocene                                 | 0                   |
| Middle Pleistocene                      | Middle Pleistocene                      | 0                   |
| Middle Quaternary                       | Middle Quaternary                       | 0                   |
| Miocene to Pleistocene                  | Miocene to Pleistocene                  | 0                   |
| Mostly Pleistocene                      | Mostly Pleistocene                      | 0                   |
| Neogene                                 | Paleogene                               | 0                   |
| Neogene                                 | Neogene                                 | 0                   |
| Paleogene to Neogene                    | Paleogene to Neogene                    | 0                   |
| Pleistocene                             | Pliocene                                | 0                   |
| Pleistocene                             | Pleistocene                             | 0                   |
| Pleistocene                             | Late Miocene                            | 0                   |
| Pleistocene and Neocene                 | Pleistocene and Neocene                 | 0                   |
| Pliocene to Pleistocene                 | Pliocene to Pleistocene                 | 0                   |
| Quartär, Pleistozän                     | Quartär, Pleistozän                     | 0                   |
| Quaternary (0.15 Ma)                    | Pleistocene (0.15 Ma)                   | 0                   |
| Quaternary (0.23 Ma)                    | Pleistocene (0.23 Ma)                   | 0                   |
| Quaternary (0.26Ma)                     | Quaternary (0.26Ma)                     | 0                   |
| Quaternary (0.37 Ma)                    | Pleistocene (0.37 Ma)                   | 0                   |
| Quaternary (0.64-0.7Ma)                 | Quaternary (0.64-0.7Ma)                 | 0                   |
| Quaternary (0.89 Ma)                    | Pleistocene (0.89 Ma)                   | 0                   |
| Quaternary (1.1 Ma)                     | Quaternary (1.1 Ma)                     | 0                   |
| Quaternary (1.29 Ma)                    | Quaternary (1.29 Ma)                    | 0                   |
| Quaternary, >0.2Ma                      | Pleistocene, >0.2Ma                     | 0                   |
| Cainozoic                               | Cainozoic                               | 0.02                |
| Cenozoic                                | Cenozoic                                | 0.02                |
| Quaternary                              | Tertiary                                | 0.02                |
| Quaternary                              | Cainozoic                               | 0.02                |

|                                   |                                   |       |
|-----------------------------------|-----------------------------------|-------|
| Quaternary and Tertiary           | Quaternary and Tertiary           | 0.02  |
| QUATERNARY OR TERTIARY            | QUATERNARY OR TERTIARY            | 0.02  |
| Tertiary(?) and Quaternary        | Tertiary(?) and Quaternary        | 0.02  |
| Tertiary-Quaternary               | Tertiary-Quaternary               | 0.02  |
| Oligocene and younger             | Oligocene and younger             | 0.03  |
| Holocene                          | Miocene                           | 0.05  |
| Miocene to Holocene               | Miocene to Holocene               | 0.05  |
| Miocene to Quaternary             | Miocene to Quaternary             | 0.05  |
| Neogene                           | Quaternary                        | 0.05  |
| Neogene to Holocene               | Neogene to Holocene               | 0.05  |
| quaternary                        | neogene                           | 0.05  |
| Quaternary                        | Neogene                           | 0.05  |
| PLIOCENO-PLEISTOCENO-HOLOCENO     | PLIOCENO-PLEISTOCENO-HOLOCENO     | 0.22  |
| Quaternary                        | Pliocene                          | 0.22  |
| Quaternary to Pliocene            | Quaternary to Pliocene            | 0.22  |
| Quaternary (0-4 Ma)               | Quaternary (0-4 Ma)               | 0.29  |
| Middle Pliocene to Holocene       | Middle Pliocene to Holocene       | 0.33  |
| Holocene                          | Pleistocene                       | 0.45  |
| Pleistocene to Holocene           | Pleistocene to Holocene           | 0.45  |
| Quaternary                        | Upper Quaternary                  | 0.45  |
| Quaternary                        | Pleistocene                       | 0.45  |
| Quaternary                        | Quaternary                        | 0.45  |
| Upper Quaternary                  | Middle Quaternary                 | 0.45  |
| Quaternary, <0.4Ma                | Pleistocene, <0.4Ma               | 2.93  |
| Quaternary (<0.27 Ma)             | Pleistocene (<0.27 Ma)            | 4.33  |
| Late Pleistocene to Holocene      | Late Pleistocene to Holocene      | 9.29  |
| Quaternary (ca. 10-20 000 yrs BP) | Quaternary (ca. 10-20 000 yrs BP) | 17    |
| Holocene, <40ka                   | Holocene, <40ka                   | 29.25 |
| Holocene                          | Holocene                          | 100   |
| Holocene (postglacial time)       | Holocene (postglacial time)       | 100   |
| Upper Quaternary                  | Upper Quaternary                  | 100   |

222

223

224

225 Table S30: Table showing the age classifications of additional data of several geological maps  
 226 that were used for the GUM database with our interpretation (third column). Map sources are:  
 227 Afghanistan (Doebrich et al., 2006), Australia (Raymond et al., 2012), Austria (Geologische  
 228 Bundesanstalt (GBA), 2013), Bolivia (GeoBolivia, 2000), Canada (Fulton, 1995), Caribbean  
 229 region (French and Schenk, 2004), China (China Geological Survey, 2002), Colombia (Gomez  
 230 Tapias et al., 2015), Ethiopia (Tefera et al., 1996), Iran (Pollastro et al., 1999), Japan  
 231 (Geological Survey of Japan AIST (ed.) (2009),  
 232 [https://gbank.gsj.jp/seamless/download/downloadIndex\\_e.html](https://gbank.gsj.jp/seamless/download/downloadIndex_e.html), accessed May 2016), North  
 233 Africa 1 (Alimen et al., 1973), North Africa 2 (Alimen et al., 1978), Russia (Zastrozhnov et al.,  
 234 2014), Siegen, Trier, Köln, Frankfurt (Main, west) (Bundesanstalt für Geowissenschaften und  
 235 Rohstoffe, 2007), Spain (Canaries Islands), Spain (Instituto Geológico y Minero de España,  
 236 1988), Tanzania (Geological Survey of Tanzania, Geo-Economic Data (1:2M) – Geology,  
 237 <http://www.gmis-tanzania.com/>, accessed May 2016), USA (Soller et al., 2009).

| <b>Age_Min</b>     | <b>Age_Max</b>      | <b>HoloceneArea</b> |
|--------------------|---------------------|---------------------|
| 0.19M              | 0.215M              | 0                   |
| 0.45M              | 0.65M               | 0                   |
| Plio/Pleistocene   | Sarmatian/Pannonian | 0                   |
| Pleistocene        | Pliocene            | 0                   |
| 0.26M              | 1M                  | 0                   |
| 0.3M               | 1M                  | 0                   |
| 0.01M              | 2.5M                | 0                   |
| Early Pleistocene  | Early Pleistocene   | 0                   |
| 0.126              | 0.780               | 0                   |
| Middle Pleistocene | Middle Pleistocene  | 0                   |
| Late Pleistocene   | Late Pleistocene    | 0                   |
| Pleistocene        | Pleistocene         | 0                   |
| Middle Pleistocene | Late Pleistocene    | 0                   |
| Early Pleistocene  | Middle Pleistocene  | 0                   |
| Cenozoic           | Cenozoic            | 0.02                |
| 0                  | 23Ma                | 0.05                |
| Holocene           | Pliocene            | 0.22                |
| Quaternary         | Quaternary          | 0.45                |
| Holocene           | Late Pleistocene    | 9.29                |

238

239

240 **References**

- 241 Alimen, H., Choubert, G., International association for quaternary research, Unesco, 1973.  
242 Carte Internationale du Quaternaire de l'Afrique 1:2,500,000 - Afrique du nord / Prepared  
243 by the Subcommission of INQUA for the Quaternary map of Africa under the aegis of the  
244 National Centre of Scientific Research. United Nations Educational, Scientific and  
245 Cultural Organization, Sub-Commission of INQUA for the *Quaternary Map of Africa*,  
246 Paris.
- 247 Alimen, H., Choubert, G., International association for quaternary research, Unesco, 1978.  
248 Carte Internationale du Quaternaire de l'Afrique 1:2,500,000 - Sahara Occidental /  
249 Prepared by the Subcommission of INQUA for the Quaternary map of Africa with the  
250 support of the National Centre of Scientific Research. United Nations Educational,  
251 Scientific and Cultural Organization, Sub-Commission of INQUA for the *Quaternary Map*  
252 *of Africa*, Paris.
- 253 Balagizi, C.M. et al., 2015. River geochemistry, chemical weathering, and atmospheric CO2  
254 consumption rates in the Virunga Volcanic Province (East Africa). *Geochemistry,*  
255 *Geophysics, Geosystems*, 16(8): 2637-2660.
- 256 Bluth, G.J., Kump, L.R., 1994. Lithologic and climatologic controls of river chemistry.  
257 *Geochimica et Cosmochimica Acta*, 58(10): 2341-2359.
- 258 Börker, J., Hartmann, J., Amann, T., Romero-Mujalli, G., 2018. Terrestrial sediments of the  
259 earth: development of a global unconsolidated sediments map database (GUM).  
260 *Geochemistry, Geophysics, Geosystems*, 19.
- 261 Branca, S., Coltelli, M., Groppelli, G., Lentini, F., 2011. Geological map of Etna volcano, 1:  
262 50,000 scale. *Italian Journal of Geosciences*, 130(3): 265-291.
- 263 Bundesanstalt für Geowissenschaften und Rohstoffe, 2007. Geologische Übersichtskarte der  
264 Bundesrepublik Deutschland 1:200,000 (GÜK200).
- 265 China Geological Survey, 2002. Geological Atlas of China - Chinese geological map  
266 (1:2,500,000). Geological Press.
- 267 De Mulder, M., Hertogen, J., Deutsch, S., André, L., 1986. The role of crustal contamination in  
268 the potassic suite of the Karisimbi volcano (Virunga, African Rift Valley). *Chemical*  
269 *geology*, 57(1): 117-136.
- 270 Dessert, C., Dupré, B., Gaillardet, J., François, L.M., Allègre, C.J., 2003. Basalt weathering laws  
271 and the impact of basalt weathering on the global carbon cycle. *Chemical Geology*,  
272 202(3-4): 257-273.
- 273 Doebrich, J.L. et al., 2006. Geologic age and lithology of Afghanistan (glgafg.shp), U.S.  
274 Geological Survey Open File Report. U.S. Geological Survey, Denver, CO. U.S.A.
- 275 Fekete, B.M., Vörösmarty, C.J., Grabs, W., 2002. High-resolution fields of global runoff  
276 combining observed river discharge and simulated water balances. *Global*  
277 *Biogeochemical Cycles*, 16(3).
- 278 French, C.D., Schenk, C.J., 2004. Surface Geology of the Caribbean Region (geo6bg). U.S.  
279 Geological Survey, Central Energy Resources Team, Denver, Colorado.
- 280 Fulton, R., 1995. Surficial materials of Canada. In: Geological Survey of Canada (Editor), Map  
281 1880A, scale 1:5 000 000. Natural Resources Canada, Ottawa.
- 282 GeoBolivia, 2000. Mapa geologico de Bolivia, 2000. Servicio Nacional de Geología y Técnico  
283 de Minas - SERGEOTECMIN.
- 284 Geological Survey of Japan AIST (ed.), 2009. Seamless digital geological map of Japan  
285 1:200,000. Dec 15, 2009 version. Research Information Database DB084. Geological  
286 Survey of Japan, National Institute of Advanced Industrial Science and Technology.
- 287 Geologische Bundesanstalt (GBA), 2013. Kartographisches Modell 1:500000 Austria -  
288 Geologie.

289 Gioncada, A. et al., 2010. The volcanic rocks of Easter Island (Chile) and their use for the Moai  
290 sculptures. *European Journal of Mineralogy*, 22(6): 855-867.

291 Goll, D.S., Moosdorf, N., Hartmann, J., Brovkin, V., 2014. Climate-driven changes in chemical  
292 weathering and associated phosphorus release since 1850: Implications for the land  
293 carbon balance. *Geophysical Research Letters*, 41(10): 3553-3558.

294 Gomez Tapias, J. et al., 2015. Explanatory notes: Geological Map of Colombia. In: Gomez, J.,  
295 Almanza, M.F. (Eds.), *Compilando la geología de Colombia: Una visión a 2015*. Servicio  
296 Geológico Colombiano, Publicaciones Geológicas Especiales 33, Bogotá, pp. 35-60.

297 Hartmann, J., Moosdorf, N., 2012. The new global lithological map database GLiM: A  
298 representation of rock properties at the Earth surface. *Geochemistry, Geophysics,*  
299 *Geosystems*, 13(12).

300 Hijmans, R.J., Cameron, S.E., Parra, J.L., Jones, P.G., Jarvis, A., 2005. Very high resolution  
301 interpolated climate surfaces for global land areas. *International journal of climatology*,  
302 25(15): 1965-1978.

303 Instituto Geológico y Minero de España, 1988. Mapa del Cuaternario de España a escala  
304 1:1.000.000.

305 Le Maréchal, A., 1975. Carte géologique de l'ouest du Cameroun et de l'Adamaoua. ORSTOM.

306 Li, G. et al., 2016. Temperature dependence of basalt weathering. *Earth and Planetary Science*  
307 *Letters*, 443: 59-69.

308 Moore, R.B., 1990. Volcanic geology and eruption frequency, São Miguel, Azores. *Bulletin of*  
309 *Volcanology*, 52(8): 602-614.

310 Neall, V., Stewart, R., Smith, I., 1986. History and petrology of the Taranaki volcanoes. *Royal*  
311 *Society of New Zealand Bulletin*, 23: 251-263.

312 Nehlig, P., Quinquis, J., Bucelle, M., Odon, O., 2006. Carte géologique de la Réunion. Bur. de  
313 Rech. Geol. et Min., Orleans, France.

314 Paone, A., Yun, S.-H., 2016. Pyroclastic Density Current Hazards at the Baekdusan Volcano,  
315 Korea: Analyses of Several Scenarios from a Small-Case to the Worst-Case Colossal  
316 Eruption, Updates in Volcanology-From Volcano Modelling to Volcano Geology. InTech.

317 Petricec, V., Gerards, J., Antun, P., 1971. Carte Géologique du Rwanda, Feuille Ruhengeri  
318 Nord (S2/29 NW et NE), Champs Volcanique des Birunga. Institut Géographique  
319 Militaire de Belgique.

320 Pollastro, R.M., Persits, F., Steinshouer, D., 1999. Surficial geology of Iran (geo2cg). U.S.  
321 Geological Survey, Central Energy Resources Team.

322 Price, R., McCulloch, M., Smith, I., Stewart, R., 1992. Pb-Nd-Sr isotopic compositions and trace  
323 element characteristics of young volcanic rocks from Egmont Volcano and comparisons  
324 with basalts and andesites from the Taupo Volcanic Zone, New Zealand. *Geochimica et*  
325 *cosmochimica acta*, 56(3): 941-953.

326 Raymond, O.L., Liu, S., Gallagher, R., Highet, L.M., Zhang, W., 2012. Surface Geology of  
327 Australia, 1:1 million scale, dataset 2012 edition. Commonwealth of Australia  
328 (Geoscience Australia).

329 Smets, B., Wauthier, C., d'Oreye, N., 2010. A new map of the lava flow field of Nyamulagira (DR  
330 Congo) from satellite imagery. *Journal of African Earth Sciences*, 58(5): 778-786.

331 Soller, D.R., Reheis, M.C., Garrity, C.P., Van Sistine, D.R., 2009. Map database for surficial  
332 materials in the conterminous United States. US Geological Survey Data Series, 425.

333 Stearns, H.T., Macdonald, G.A., 1946. Geology and ground-water resources of the island of  
334 Hawaii, Honolulu Advertising.

335 Suchet, P.A., Probst, J.L., 1995. A global model for present-day atmospheric/soil CO2  
336 consumption by chemical erosion of continental rocks (GEM-CO2). *Tellus B*, 47(1-2):  
337 273-280.

338 Tefera, M., Chernet, T., Haro, W., 1996. Geological Map of Ethiopia. Ministry of Mines,  
339 Geological Survey of Ethiopia, GSE.

340 Zastrozhnov, A.S. et al., 2014. Map of the Quaternary Formations of the Russian Federation.  
341 Ministry of Natural Resources and Ecology of the Russian Federation, Federal Agency  
342 on Mineral Resources, Federal State Unitary Enterprise "A.P. Karpinsky Russian  
343 Geological Research Institute" (VSEGEI), Federal State Unitary Enterprise "I.S.  
344 Gramberg Russian Research Institute for Geology and Mineral Resources of the Ocean"  
345 (VNIIOkeangeologia).

346

347
